# Supplementary material for: Rice straw ash extract/glycerol: an efficient sustainable approach for Knoevenagel condensation
Source: Royal Society of Chemistry journal article supplement (doi:10.1039/d1nj05755c), 2022-01-01
Supplement: d1nj05755c1.pdf [file d1nj05755c1.pdf]

## **RICE STRAW ASH EXTRACT/GLYCEROL: AN EFFICIENT SUSTAINABLE**

### **APPROACH FOR KNOEVENAGEL CONDENSATION**

Diego Seckler,<sup>a,c</sup> Camila M. Dea,<sup>a</sup> Elise Ane Maluf Rios,<sup>a</sup> Marcelo Godoi,<sup>b</sup> Daniel da Silveira Rampon,<sup>a</sup>

Marcelo Gonçalves Montes D'Oca,<sup>c</sup> and Caroline Da Ros Montes D'Oca\*<sup>a</sup>

<sup>a</sup> Laboratory of Polymers and Catalysis (LAPOCA), Department of Chemistry, Federal University of Paraná–  
UFPR, P. O. Box 19032, Curitiba, PR, 81531-990, Brazil.

<sup>b</sup> Food and Chemistry School, Federal University of Rio Grande – FURG, RS 95500-000, Brazil, PR, 81070-  
190, Brazil.

<sup>c</sup> Kolbe's Laboratory of Organic Synthesis, Department of Chemistry, Federal University of Paraná–UFPR, P.  
O. Box 19032, Curitiba, PR, 81531-990, Brazil.

Phone/fax: +55 (41)3361-3396, e-mail: [carolinedoca@ufpr.br](mailto:carolinedoca@ufpr.br)

### **SUPPLEMENTARY INFORMATION**

#### List of the Contents

|                                                                                              |          |
|----------------------------------------------------------------------------------------------|----------|
| <b>1 EXPERIMENTAL SECTION</b> .....                                                          | <b>2</b> |
| 1.1 General Information.....                                                                 | 2        |
| 1.2 General procedure for optimization of the reaction conditions .....                      | 2        |
| 1.3 PROCEDURE FOR OPTIMIZATION OF THE REACTION CONDITIONS .....                              | 7        |
| 1.4 GENERAL PROCEDURE FOR KNOEVENAGEL CONDENSATION .....                                     | 7        |
| 1.5 GENERAL PROCEDURE FOR TANDEM KNOEVENAGEL-MICHAEL ADDITION-<br>CYCLIZATION REACTION ..... | 9        |
| 1.6 SELECTED SPECTRA OF REPRESENTATIVE COMPOUNDS .....                                       | 11       |

## 1 EXPERIMENTAL SECTION

### 1.1 General Information

All commercially available reagents were used without further purification. The solvents employed in extraction and purification (hexane and ethyl acetate) were distilled prior to use. The reactions were monitored by TLC (thin-layer chromatography) using pre-coated silica gel 60 F254 plates. The visualization was accomplished with UV light, stained with iodine, or by the mixture between 5.0% vanillin in 10% of H<sub>2</sub>SO<sub>4</sub> and heat as developing agents. Flash chromatography was performed using Merck silica gel pore size 60 Å, 230-400 mesh with the indicated eluent system. The NMR spectra (<sup>1</sup>H and <sup>13</sup>C) were obtained on a Bruker Nuclear Ascend 400 spectrometer. The spectra were obtained either in CDCl<sub>3</sub> or DMSO-*d*<sub>6</sub> solutions. The chemical shifts ( $\delta$ ) are reported in ppm, referenced to tetramethylsilane (TMS) as the internal standard. The coupling constants (*J*) are reported in Hertz (Hz). Hydrogen coupling patterns are described as singlet (s), doublet (d), doublet of doublets (dd), doublet of doublet of doublets (ddd), doublet triplets (dt), triplet (t), triplet of doublets (td), doublet of quartets (dq), quartet (q), quintet (quint), sextet (sext), broad signal (br) and multiplet (m). Low-resolution mass spectra were obtained with a Shimadzu GC-MS-QP2010 Plus mass spectrometer. The melting point measuring for some representative compounds were obtained on a MP90 Melting Point System.

### 1.2 General procedure for optimization of the reaction conditions

The yields of the product **3a** depicted on the optimization tables (Table 1 on the manuscript) were obtained using the principle of the internal standard (IS) in GC-MS analysis.<sup>[71]</sup> Anthracene was chosen as IS. The first step of this procedure was the calibration curve plot of the average area ratio of the analyte (**3a**) relative to the average area ratio of the IS (anthracene) and the average mass ratio of the analyte (**3a**) relative to the average area ratio of the IS, in order to identify the linearity of the relationship with R<sup>2</sup>.

In this way, two stock solutions of IS (0.0201 mol L<sup>-1</sup>) and **3a** (0.0203 mol L<sup>-1</sup>) in ethyl acetate were quickly prepared in a volumetric flask (25 mL). The solutions were storage in closed flasks into the refrigerator at 5 °C, before their use on the same day. The vials (total volume of 1.5 mL) for the 10 calibration points were prepared by the addition of a constant amount of the stock IS solution (500  $\mu$ L) and a gradient amount of **3a** (50  $\mu$ L to 500  $\mu$ L), and the elution bands of **3a** and SI and the area ratio of **3a** relative to the area ratio of the IS were determined (Table 1, 2 and 3). The average of triplicate data are shown in the Table 4.

On these tables, the column described by F/G which means the ratio of analyte area and SI area. RRF is relative response factor, which is described by FRR in the tables, as well as *w<sub>i</sub>*, as described above. The slope of table 1, 2, 3, and 4 describes the relationship of ratio of analyte area/ standard area vs [analyte] in mol L<sup>-1</sup>. The method employed in all the GC-MS analysis is described as follows: **GC**: column

oven temp: 150 °C for 5.0 min; initial injection temp: 250 °C; helium carrier gas; pressure 92.4 kPa; total flow 54 mL min<sup>-1</sup>; column flow 1.0 mL min<sup>-1</sup>; linear velocity 38 cm s<sup>-1</sup>; purge flow 3.0 mL min<sup>-1</sup>; split ratio of 50. **MS**: ion source temperature: 200 °C; interface temperature: 260 °C; solvent cut time 3.0 min. Under this method, the retention time of IS was 11.031 min and the retention time of **3a** was 7.348 min.

Table 1. Calibration Curve

| vial                                   | analyte (μL) | standard (μL)   | [analyte] (mol/L)                     | [stand] (mol/L) | Analyte area     | Standard area    | F/G                | Standard mass(g)   | Analyte Mass(g)    | FRR           | Wi             | Average Wi     | J/I            | F2/G2          |
|----------------------------------------|--------------|-----------------|---------------------------------------|-----------------|------------------|------------------|--------------------|--------------------|--------------------|---------------|----------------|----------------|----------------|----------------|
| 1                                      | 50           | 500             | 6,767E-04                             | 6,663E-03       | 313978           | 9809300          | 0,03200820         | 0,00178200         | 0,00019080         | 3,34510280    | 0,00954000     | 0,00645025     | 0,107070707    | 0,032008196    |
| 2                                      | 100          | 500             | 1,353E-03                             | 6,663E-03       | 721294           | 9628255          | 0,07491430         | 0,00178200         | 0,00038160         | 2,85848509    | 0,01908000     | 0,01509663     | 0,214141414    | 0,074914302    |
| 3                                      | 150          | 500             | 2,030E-03                             | 6,663E-03       | 1253777          | 9445174          | 0,13274260         | 0,00178200         | 0,00057240         | 2,41981180    | 0,02862000     | 0,02675012     | 0,321212121    | 0,132742605    |
| 4                                      | 200          | 500             | 2,707E-03                             | 6,663E-03       | 1887487          | 9631008          | 0,19598021         | 0,00178200         | 0,00076320         | 2,18533709    | 0,03816000     | 0,03949368     | 0,428282828    | 0,195980213    |
| 5                                      | 250          | 500             | 3,383E-03                             | 6,663E-03       | 2474389          | 9627443          | 0,25701414         | 0,00178200         | 0,00095400         | 2,08297307    | 0,04770000     | 0,05179316     | 0,535353535    | 0,257014142    |
| 6                                      | 300          | 500             | 4,060E-03                             | 6,663E-03       | 3087630          | 9583838          | 0,32217051         | 0,00178200         | 0,00114480         | 1,99405041    | 0,05724000     | 0,06492339     | 0,642424242    | 0,322170512    |
| 7                                      | 350          | 500             | 4,737E-03                             | 6,663E-03       | 3610583          | 9864189          | 0,36602938         | 0,00178200         | 0,00133560         | 2,04763603    | 0,06678000     | 0,07376177     | 0,749494949    | 0,366029382    |
| 8                                      | 400          | 500             | 5,413E-03                             | 6,663E-03       | 4430012          | 9722305          | 0,45565450         | 0,00178200         | 0,00152640         | 1,87985779    | 0,07632000     | 0,09182291     | 0,856565657    | 0,455654498    |
| 9                                      | 450          | 500             | 6,090E-03                             | 6,663E-03       | 4856158          | 9639791          | 0,50376175         | 0,00178200         | 0,00171720         | 1,91288116    | 0,08586000     | 0,10151742     | 0,963636364    | 0,503761752    |
| 10                                     | 500          | 500             | 6,767E-03                             | 6,663E-03       | 5665160          | 10005389         | 0,56621087         | 0,00178200         | 0,00190800         | 1,89100409    | 0,09540000     | 0,11410208     | 1,070707071    | 0,566210869    |
| <b>Stoke Solution Standard (mol/L)</b> |              | <b>0,019996</b> | <b>Stoke Solution Analyte (mol/L)</b> | <b>0,020273</b> | <b>2830046,8</b> | <b>9695669,2</b> | <b>0,290648647</b> | <b>0,001782000</b> | <b>0,001049400</b> | <b>2,2617</b> | <b>0,05247</b> | <b>0,05857</b> | <b>0,58889</b> | <b>0,29065</b> |

Table 2. Calibration Curve

| vial                                   | analyte (μL) | standard (μL)   | [analyte] (mol/L)                     | [standard] (mol/L) | Analyte area     | Standard area    | F/G                | Standard mass      | Analyte Mass       | FRR            | Wi             | Average Wi     | J/I            | F2/G2          |
|----------------------------------------|--------------|-----------------|---------------------------------------|--------------------|------------------|------------------|--------------------|--------------------|--------------------|----------------|----------------|----------------|----------------|----------------|
| 1                                      | 50           | 500             | 6,767E-04                             | 6,633E-03          | 221977           | 9514467          | 0,023330471        | 44,55850000        | 0,00019300         | 0,00018565     | 0,00000039     | 0,00916364     |                | 0,023330471    |
| 2                                      | 100          | 500             | 1,353E-03                             | 6,633E-03          | 710315           | 9448530          | 0,075177303        | 0,00177800         | 0,00038600         | 2,88781128     | 0,01934342     | 0,01202365     | 0,217097863    | 0,075177303    |
| 3                                      | 150          | 500             | 2,030E-03                             | 6,633E-03          | 1348435          | 9428079          | 0,143023303        | 0,00177800         | 0,00057900         | 2,27687927     | 0,02901513     | 0,02287476     | 0,325646794    | 0,143023303    |
| 4                                      | 200          | 500             | 2,707E-03                             | 6,633E-03          | 2185222          | 10339176         | 0,211353593        | 0,00177800         | 0,00077200         | 2,05435696     | 0,03868684     | 0,03380332     | 0,434195726    | 0,211353593    |
| 5                                      | 250          | 500             | 3,383E-03                             | 6,633E-03          | 2578075          | 9379199          | 0,274871554        | 0,00177800         | 0,00096500         | 1,97453920     | 0,04835855     | 0,04396221     | 0,542744657    | 0,274871554    |
| 6                                      | 300          | 500             | 4,060E-03                             | 6,633E-03          | 3112220          | 9135079          | 0,340688898        | 0,00177800         | 0,00115800         | 1,91169595     | 0,05803026     | 0,05448886     | 0,651293588    | 0,340688898    |
| 7                                      | 350          | 500             | 4,737E-03                             | 6,633E-03          | 3864174          | 9561206          | 0,404151317        | 0,00177800         | 0,00135100         | 1,88009413     | 0,06770197     | 0,06463886     | 0,75984252     | 0,404151317    |
| 8                                      | 400          | 500             | 5,413E-03                             | 6,633E-03          | 4382700          | 10003624         | 0,438111228        | 0,00177800         | 0,00154400         | 1,98212553     | 0,07737368     | 0,07007032     | 0,868391451    | 0,438111228    |
| 9                                      | 450          | 500             | 6,090E-03                             | 6,633E-03          | 4975738          | 8469743          | 0,587472135        | 0,00177800         | 0,00173700         | 1,66295612     | 0,08704539     | 0,09395870     | 0,976940382    | 0,587472135    |
| 10                                     | 500          | 500             | 6,767E-03                             | 6,633E-03          | 5592976          | 6799583          | 0,822546912        | 0,00177800         | 0,00193000         | 1,31966858     | 0,09671710     | 0,13155592     | 1,085489314    | 0,822546912    |
| <b>Stoke Solution Standard (mol/L)</b> |              | <b>0,019951</b> | <b>Stoke Solution Analyte (mol/L)</b> | <b>0,020507</b>    | <b>2897183,2</b> | <b>9207868,6</b> | <b>0,332072671</b> | <b>4,457450200</b> | <b>0,001061500</b> | <b>1,79503</b> | <b>0,05223</b> | <b>0,05365</b> | <b>0,65129</b> | <b>0,33207</b> |

Table 3. Calibration Curve

| vial                                   | analyte (μL) | standard (μL)   | [analyte] (mol/L)                     | [standard] (mol/L) | Analyte area   | Standard area  | F2/G2              | Standard mass      | Analyte Mass       | FRR           | Wi            | Average Wi    | J/I           | F2/G2         |
|----------------------------------------|--------------|-----------------|---------------------------------------|--------------------|----------------|----------------|--------------------|--------------------|--------------------|---------------|---------------|---------------|---------------|---------------|
| 1                                      | 50           | 500             | 6,767E-04                             | 6,633E-03          | 227888         | 9402187        | 0,024237765        | 0,00178200         | 0,00019040         | 4,40825463    | 0,00952000    | 0,00517580    | 0,10684624    | 0,024237765   |
| 2                                      | 100          | 500             | 1,353E-03                             | 6,633E-03          | 582608         | 9066855        | 0,064256901        | 0,00178200         | 0,00038080         | 3,32559583    | 0,01904000    | 0,01372160    | 0,21369248    | 0,064256901   |
| 3                                      | 150          | 500             | 2,030E-03                             | 6,633E-03          | 1281349        | 9467909        | 0,135336007        | 0,00178200         | 0,00057120         | 2,36846592    | 0,02856000    | 0,02890004    | 0,320538721   | 0,135336007   |
| 4                                      | 200          | 500             | 2,707E-03                             | 6,633E-03          | 1872776        | 9213839        | 0,203256862        | 0,00178200         | 0,00076160         | 2,10268405    | 0,03808000    | 0,04340405    | 0,427384961   | 0,203256862   |
| 5                                      | 250          | 500             | 3,383E-03                             | 6,633E-03          | 2262716        | 9743720        | 0,232223011        | 0,00178200         | 0,00095200         | 2,30050932    | 0,04760000    | 0,04958957    | 0,534231201   | 0,232223011   |
| 6                                      | 300          | 500             | 4,060E-03                             | 6,633E-03          | 2988741        | 9178525        | 0,325623235        | 0,00178200         | 0,00114240         | 1,96877057    | 0,05712000    | 0,06953452    | 0,641077441   | 0,325623235   |
| 7                                      | 350          | 500             | 4,737E-03                             | 6,633E-03          | 3545177        | 9038501        | 0,392230636        | 0,00178200         | 0,00133280         | 1,90684667    | 0,06664000    | 0,08375805    | 0,747923681   | 0,392230636   |
| 8                                      | 400          | 500             | 5,413E-03                             | 6,633E-03          | 3986995        | 9299198        | 0,428746113        | 0,00178200         | 0,00152320         | 1,99365054    | 0,07616000    | 0,09155567    | 0,854769921   | 0,428746113   |
| 9                                      | 450          | 500             | 6,090E-03                             | 6,633E-03          | 5149363        | 9495881        | 0,542273329        | 0,00178200         | 0,00171360         | 1,77330529    | 0,08568000    | 0,11579860    | 0,961616162   | 0,542273329   |
| 10                                     | 500          | 500             | 6,767E-03                             | 6,633E-03          | 5389486        | 9173133        | 0,587529473        | 0,00178200         | 0,00190400         | 1,81856817    | 0,09520000    | 0,12546272    | 1,068462402   | 0,587529473   |
| <b>Stoke Solution Standard (mol/L)</b> |              | <b>0,019996</b> | <b>Stoke Solution Analyte (mol/L)</b> | <b>0,020230569</b> | <b>2728710</b> | <b>9307975</b> | <b>0,293571333</b> | <b>0,001782000</b> | <b>0,001047200</b> | <b>2,3967</b> | <b>0,0524</b> | <b>0,0627</b> | <b>0,5877</b> | <b>0,2936</b> |

Table 4. Average of data from tables 1, 2 and 3

| vial                            | analyte (μL) | standard (μL) | [analyte] (mol/L)              | [standard] (mol/L) | Analyte area | Standard area | F2/G2     | Standard mass | Analyte Mass | FRR         | Wi          | Average Wi  | J/I         | F2/G2       |        |
|---------------------------------|--------------|---------------|--------------------------------|--------------------|--------------|---------------|-----------|---------------|--------------|-------------|-------------|-------------|-------------|-------------|--------|
| 1                               | 50           | 500           | 1,584E-06                      | 6,718E-06          | 254614       | 9575318       | 0,0265255 | 14,85402133   | 0,00019140   | 2,58451436  | 0,00635346  | 0,00692990  | 1,28854E-05 | 0,026590692 |        |
| 2                               | 100          | 500           | 1,356E-06                      | 6,718E-06          | 671406       | 9381213       | 0,0714495 | 0,00178067    | 0,00038280   | 3,02396406  | 0,01915447  | 0,01361396  | 0,214975665 | 0,071569172 |        |
| 3                               | 150          | 500           | 2,033E-06                      | 6,718E-06          | 1294520      | 9447054       | 0,1370340 | 0,00178067    | 0,00057420   | 2,35505233  | 0,02873171  | 0,02617497  | 0,322463497 | 0,137028997 |        |
| 4                               | 200          | 500           | 2,711E-06                      | 6,718E-06          | 1981828      | 9728008       | 0,2035302 | 0,00178067    | 0,00076560   | 2,11412603  | 0,03830895  | 0,03890035  | 0,429951329 | 0,203723969 |        |
| 5                               | 250          | 500           | 3,389E-06                      | 6,718E-06          | 2438393      | 9583454       | 0,2547029 | 0,00178067    | 0,00095700   | 2,11934053  | 0,04788618  | 0,04844831  | 0,537439161 | 0,25443784  |        |
| 6                               | 300          | 500           | 4,067E-06                      | 6,718E-06          | 3062864      | 9299147       | 0,3294942 | 0,00178067    | 0,00114840   | 1,95817231  | 0,05746342  | 0,06298225  | 0,644926994 | 0,329370377 |        |
| 7                               | 350          | 500           | 4,744E-06                      | 6,718E-06          | 3673311      | 9487965       | 0,3874704 | 0,00178067    | 0,00133980   | 1,94485894  | 0,06704066  | 0,07405290  | 0,752414826 | 0,387154801 |        |
| 8                               | 400          | 500           | 5,422E-06                      | 6,718E-06          | 4266569      | 9675042       | 0,4408373 | 0,00178067    | 0,00153120   | 1,95187795  | 0,07661789  | 0,08448297  | 0,859902658 | 0,440987114 |        |
| 9                               | 450          | 500           | 6,100E-06                      | 6,718E-06          | 4993753      | 9201805       | 0,5445024 | 0,00178067    | 0,00172260   | 1,78304752  | 0,08619513  | 0,10375824  | 0,96739049  | 0,542692765 |        |
| 10                              | 500          | 500           | 6,778E-06                      | 6,718E-06          | 5549207      | 8659368       | 0,6587624 | 0,00178067    | 0,00191400   | 1,67641362  | 0,09577237  | 0,12370691  | 1,074878323 | 0,640832809 |        |
| Stoke Solution Standard (mol/L) |              | 0,019981      | Stoke Solution Analyte (mol/L) |                    | 0,020337     | 2818647       | 9403838   | 0,305430884   | 1,487004733  | 0,001052700 | 2,151136766 | 0,052352424 | 0,058305076 | 0,5804      | 0,3034 |

First Calibration Curve (Table 1)

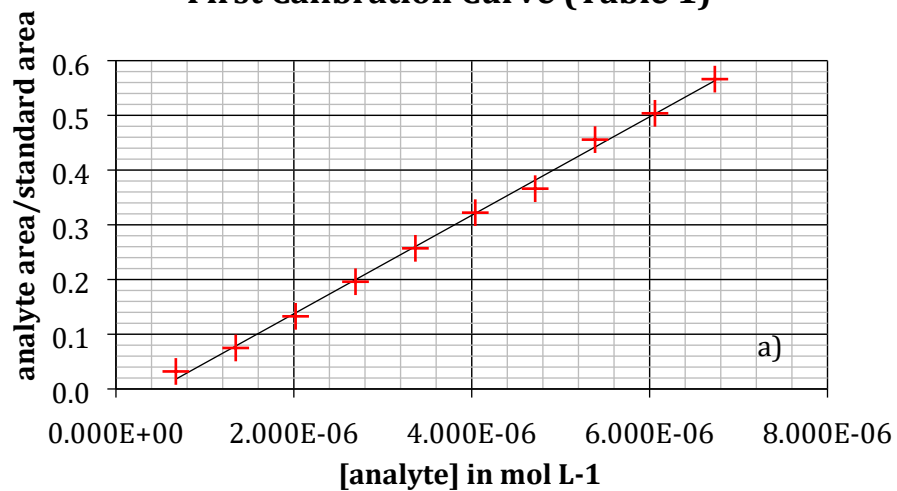

Second Calibration Curve (Table 2)

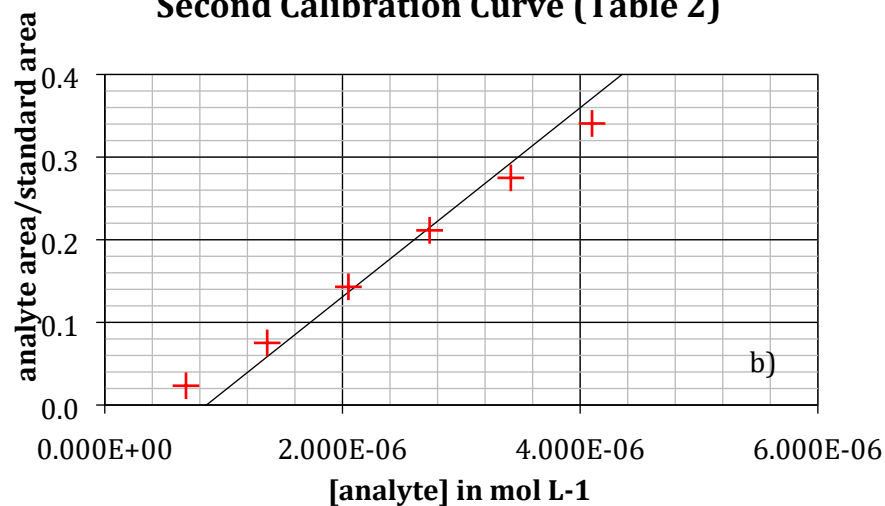

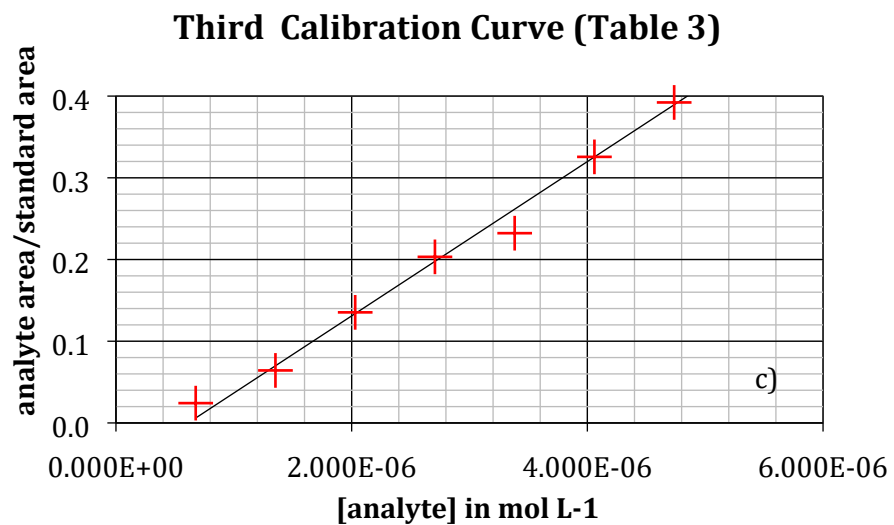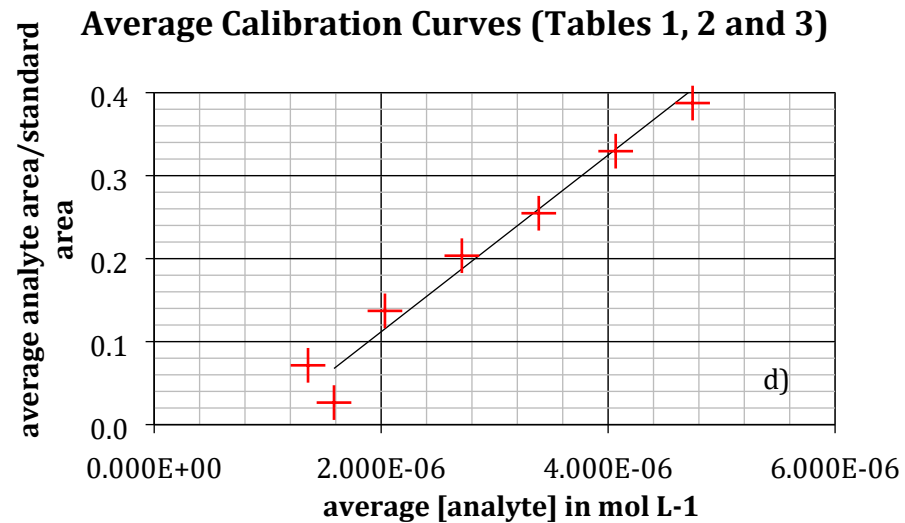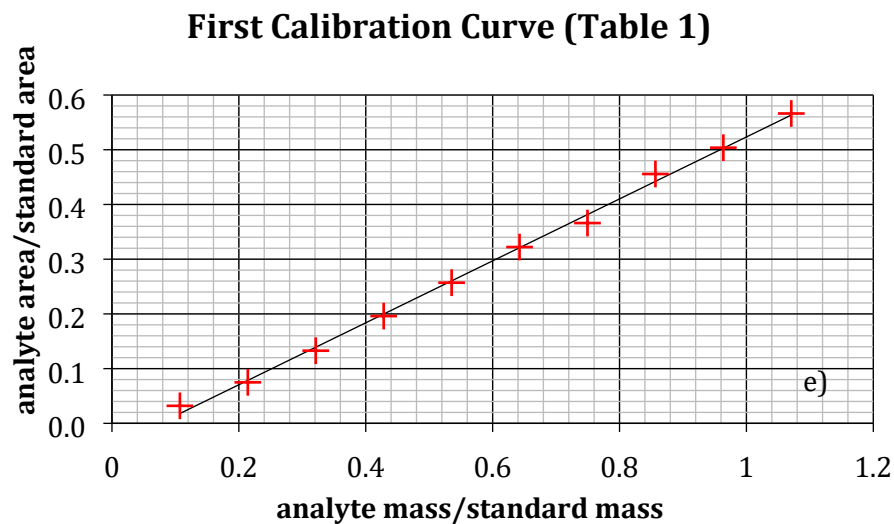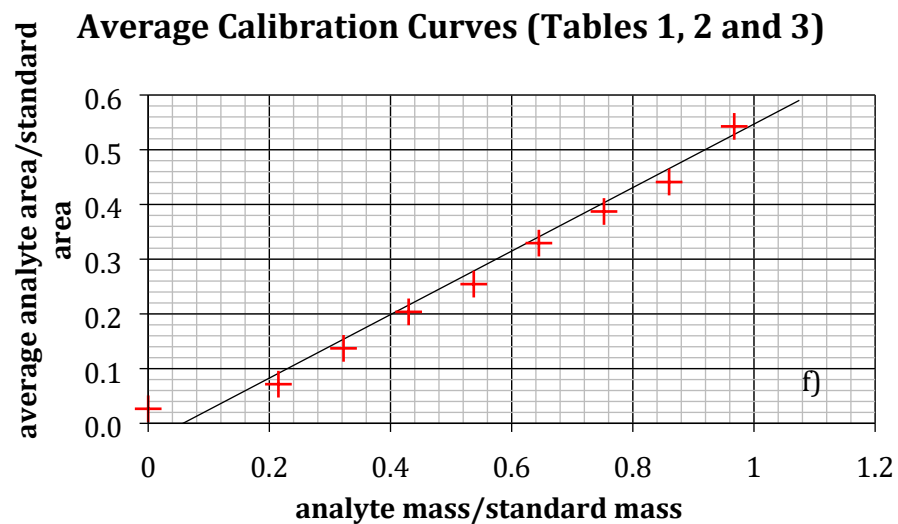

**FIG. S1.** The slope of line describes the relationship of ratio of PA by SA vs [analyte] mol L<sup>-1</sup>. The same behavior of slope of line describes the relationship of ratio of PA by SA vs ratio of AM by SM. PA = Product area; AS = Standard area; AM = Analyte mass; SM = Standard mass.

### 1.3 PROCEDURE FOR OPTIMIZATION OF THE REACTION CONDITIONS

As described above, the reaction optimization was based on the yields of **3a** obtained in the experiments of the Table 1 of the manuscript. In these reactions, acetylacetone (**2a**), benzaldehyde (**1a**), WERSA, and co-solvent were added into the 5 mL tube reaction. After the proper time and temperature of the experiments (Tables 1 of the manuscript), the quenching of reaction was done as follows: the crude of reaction was added into the 50 mL becker flask and then 25 mL of ethyl acetate was added. In a second one 25 mL becker flask of a freshly prepared stock solution of IS (anthracene, 0.0200 mol L<sup>-1</sup>). After that, an aliquot of 500  $\mu$ L of stock solution of IS was took and added to the sample vial, followed by addition of 300  $\mu$ L of crude product along with 1500  $\mu$ L of ethyl acetate. Based on the chromatogram of the sample, the area ratio of **3a**/IS and the mass ratio of **3a**/IS were obtained, which allowed the yield determination of **3a**. In an experiment (Table 1, entry 17), the organic layer containing **3a** and IS was concentrated under vacuum. The product **3a** was obtained as red oil (91 mg, 97% yield) after purification by flash chromatography using hexane and ethyl acetate (100:0; 95:5 93:7 and 90:10, v:v) as eluent.

### 1.4 GENERAL PROCEDURE FOR KNOEVENAGEL CONDENSATION

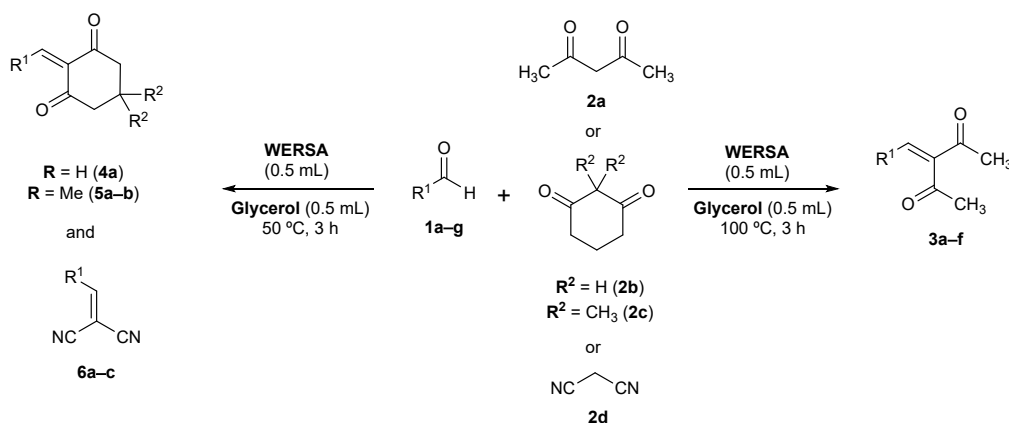

**SCHEME S1.** The condensation reaction of aldehydes with 1, 3-dicarbonyl compounds, and malononitrile.

The aldehydes **1a-g** (1.5 mmol, 3.0 equiv.) and 1,3-dicarbonyl compound **2a-c** (0.5 mmol, 1.0 equiv.) were added into 5 mL tube reaction, followed by the addition of WERSA (0.5 mL) and glycerol (0.5 mL). The mixture was coupled in a condenser and heated at 100 °C for 3 h for **2a** and at 50 °C for **2b-c** for the appropriate time as described at table 2 (Manuscript). After the completion of the reaction (the progress of the reaction was monitored by TLC (10% EtOAc/hexane) and/or GC) ethyl acetate (1 mL) was added into the flask reaction and the organic layer was extracted, dried over anhydrous MgSO<sub>4</sub> and the crude product was purified by column chromatography using silica gel 60 (230–400 mesh particle size, 40-63  $\mu$ m), employing hexane/ethyl acetate with increasing polarity. The desired products **3a-f**, **4a**, **5a-c**, and **6a-c** were identified by GC-MS, <sup>1</sup>H NMR, and <sup>13</sup>C NMR spectroscopy when required.

**3-(Phenylbenzylidene)-2,4-pentanedione (3a).**<sup>[72]</sup> The product was isolated as a red oil (91.3 mg, 97%) by flash chromatography employing a mixture of hexane and ethyl acetate (100:0, 90:10, 80:20, 70:30; v:v) as eluent. <sup>1</sup>H NMR (400 MHz, CDCl<sub>3</sub>) δ 7.50 (s, 1H), 7.39 (m, 5H), 2.41 (s, 3H), 2.27 (s, 3H). <sup>13</sup>C NMR (100 MHz, CDCl<sub>3</sub>) δ 205.4, 196.5, 142.8, 139.8, 132.9, 130.6, 129.7, 129.0, 31.6, 26.4. **MS:** *m/z* (*Rel. Int.*): 187 (M<sup>+</sup>, 100), 43 (96).

**3-(2-Chlorophenylbenzylidene)-2,4-pentanedione (3b).**<sup>[73]</sup> The product was isolated as a white solid (103.4 mg, 93%) by flash chromatography employing a mixture of hexane and ethyl acetate (100:0, 90:10, 80:20, 70:30 v:v) as eluent. <sup>1</sup>H NMR (400 MHz, CDCl<sub>3</sub>) δ 7.78 (s, 1H), 7.50 – 7.43 (m, 1H), 7.40 – 7.30 (m, 2H), 7.30 – 7.23 (m, 1H), 2.46 (s, 3H), 2.18 (s, 3H). <sup>13</sup>C NMR (100 MHz, CDCl<sub>3</sub>) δ 204.2, 196.3, 144.4, 136.5, 134.4, 131.7, 131.4, 130.2, 130.0, 127.2, 31.6, 26.7. **MS:** *m/z* (*Rel. Int.*): 187 (M<sup>+</sup>, 100), 43 (95.6).

**3-(2-Fluorophenylbenzylidene)-2,4-pentanedione (3c).**<sup>[73]</sup> The product was isolated as an uncoloured liquid (97.0 mg, 94%) by flash chromatography employing a mixture of hexane and ethyl acetate (70:30; v:v) as eluent. <sup>1</sup>H NMR (400 MHz, CDCl<sub>3</sub>) δ 7.64 (s, 1H), 7.44 – 7.39 (m, 1H), 7.39 – 7.33 (m, 1H), 7.18 – 7.09 (m, 2H), 2.45 (s, 3H), 2.29 (s, 3H). <sup>13</sup>C NMR (100 MHz, CDCl<sub>3</sub>) δ 204.5, 196.5, 160.6 (d, *J* = 252.5 Hz), 144.1, 132.5 (d, *J* = 8.7 Hz), 132.0 (d, *J* = 4.9 Hz), 130.0, 124.6 (d, *J* = 3.2 Hz), 121.2 (d, *J* = 12.4 Hz), 116.0 (d, *J* = 21.7 Hz), 31.4, 26.5. **MS:** *m/z* (*Rel. Int.*): 206 (M<sup>+</sup>, 33.7), 149 (71.4), 43 (100).

**3-(2-Thienylmethylene)-2,4-pentanedione (3d).**<sup>[72]</sup> The product was isolated as a yellow liquid (89.4 mg, 92%) by flash chromatography employing a mixture of hexane and ethyl acetate (70:30; v:v) as eluent. <sup>1</sup>H NMR (400 MHz, CDCl<sub>3</sub>) δ 7.55 (dd, *J* = 5.1, and 0.4 Hz, 1H), 7.53 (s, 2H), 7.34 (dd, *J* = 3.7, and 0.5 Hz, 1H), 7.10 (dd, *J* = 5.1, and 3.7 Hz, 1H), 2.44 (s, 4H), 2.41 (s, 5H). <sup>13</sup>C NMR (100 MHz, CDCl<sub>3</sub>) δ 205.0, 196.3, 139.3, 140.0, 134.1, 132.4, 132.1, 128.2, 31.3, 26.1. **MS:** *m/z* (*Rel. Int.*): 194 (M<sup>+</sup>, 41), 179 (20), 151 (21), 137 (85), 109 (21), 43 (100).

**3-(2-Furanylbenzylidene)-2,4-pentanedione (3e).**<sup>[74]</sup> The product was isolated as an uncoloured liquid (79.3 mg, 89%) by flash chromatography employing a mixture of hexane and ethyl acetate (100:0, 90:10, 80:20; v:v) as eluent. <sup>1</sup>H NMR (400 MHz, CDCl<sub>3</sub>) δ 7.55 (d, *J* = 1.8 Hz, 1H), 7.17 (s, 1H), 6.78 (d, *J* = 3.7 Hz, 1H), 6.52 (dd, *J* = 3.5, and 1.8 Hz, 1H), 2.44 (s, 3H), 2.37 (s, 3H). <sup>13</sup>C NMR (100 MHz, CDCl<sub>3</sub>) δ 204.3, 195.8, 149.0, 146.5, 138.4, 125.0, 118.3, 113.0, 31.5, 26.1. **MS:** *m/z* (*Rel. Int.*): 178 (M<sup>+</sup>, 33.5), 121 (85.3), 43 (100).

**3-(2-Hydroxymethylfurylbenzylidene)-2,4-pentanedione (3f).**<sup>[74]</sup> The product was isolated as a brown liquid (102.1 mg, 98%) by flash chromatography employing a mixture of hexane and ethyl acetate (100:0, 90:10, 80:20; v:v) as eluent. <sup>1</sup>H NMR (400 MHz, CDCl<sub>3</sub>) δ 7.13 (s, 1H), 6.73 (d, *J* = 3.4 Hz, 1H), 6.40 (d, *J* = 3.4 Hz, 1H), 4.58 (s, 2H), 3.15 (br, 1H), 2.43 (s, 3H), 2.35 (s, 3H). <sup>13</sup>C NMR (100 MHz, CDCl<sub>3</sub>) δ 205.1, 195.9, 159.1, 148.3, 138.0, 125.1, 119.3, 110.6, 57.2, 31.4, 26.0. **MS:** *m/z* (*Rel. Int.*): 177 (M<sup>+</sup>, 28.4), 135 (24.8), 43 (100).

**2-Benzylidenecyclohexane-1,3-dione (4a).**<sup>[75]</sup> The product was isolated as white solid (87.8 mg, 88%) by flash chromatography employing a mixture of hexane and ethyl acetate



(100:0, 90:10, 80:20; v:v) as eluent. **<sup>1</sup>H NMR** (400 MHz, DMSO-*d*<sub>6</sub>) δ 7.21 – 7.0 (m, 5H), 6.89 (s, 1H), 2.57 – 2.23 (m, 2H), 2.21 – 2.01 (m, 2H), 1.93 – 1.54 (m, 2H). **<sup>13</sup>C NMR** (100 MHz, DMSO-*d*<sub>6</sub>) δ 169.5, 167.8, 145.6, 144.7, 128.9, 125.6, 125.2, 116.2, 39.4, 36.1, 20.2. **MS**: *m/z* (*Rel. Int.*): 200 (M<sup>+</sup>, 69.6), 199 (100), 102 (43).

**2-(2-Thylenilmethylene)-5,5-dimethyl-1,3-cyclohexanedione (5a)**.<sup>[76]</sup> The product was obtained as yellow liquid (104.2 mg, 89%) by flash chromatography employing a mixture of hexane and ethyl acetate (100:0, 90:10, 80:20) as eluent. **<sup>1</sup>H NMR** (400 MHz, CDCl<sub>3</sub>) δ 8.35 (s, 1H), 7.93 – 7.75 (m, 2H), 7.23 (dd, *J* = 5.1, and 3.9 Hz, 1H), 2.58 (d, *J* = 11.1 Hz, 3H), 1.09 (s, 6H). **<sup>13</sup>C NMR** (100 MHz, CDCl<sub>3</sub>) δ 197.8, 197.7, 145.0, 143.6, 139.6, 128.2, 53.4, 52.3, 28.6. **MS**: *m/z* (*Rel. Int.*): 234 (M<sup>+</sup>, 100), 219 (13), 191 (21), 122 (64), 150 (30).

**2-(2-Furanylmethylene)-5,5-dimethyl-1,3-cyclohexanedione (5b)**.<sup>[76]</sup> The product was obtained as brown liquid (98.9 mg, 91%) by flash chromatography employing a mixture of hexane and ethyl acetate (100:0, 90:10, 80:20) as eluent. **<sup>1</sup>H NMR** (400 MHz, CDCl<sub>3</sub>) δ 7.45 – 6.79 (m, 1H), 6.28 (dd, *J* = 3.2, and 1.2 Hz, 1H), 6.06 – 5.79 (m, 1H), 5.38 (s, 1H), 2.33 (br, 4H), 1.17 – 1.13 (br, 3H), 1.12 – 1.05 (br, 3H). **<sup>13</sup>C NMR** (100 MHz, CDCl<sub>3</sub>) δ 189.4, 151.7, 141.0, 114.2, 110.1, 106.3, 46.8, 46.3, 31.4, 29.2. **MS**: *m/z* (*Rel. Int.*): 218 (M<sup>+</sup>, 100), 190 (34.9), 162 (77.1), 106 (75.2).

**2-(4-Methoxybenzylidene)-5,5-dimethyl-1,3-cyclohexanedione (5c)**.<sup>[77]</sup> The product was obtained as yellow solid (107.5 mg, 83%) by flash chromatography employing a mixture of hexane and ethyl acetate (100:0, 90:10, 80:20). **<sup>1</sup>H NMR** (400 MHz, CDCl<sub>3</sub>) δ 7.05 – 6.72 (m, 5H), 3.76 (s, 3H), 2.37 (s, 4H), 1.22 (s, 3H), 1.09 (s, 3H). **<sup>13</sup>C NMR** (100 MHz, CDCl<sub>3</sub>) δ 190.3, 189.3, 132.0, 130.0, 127.8, 115.8, 46.5, 32.1, 31.4, 29.6, 27.0. **MS**: *m/z* (*Rel. Int.*): 258 (M<sup>+</sup>, 82.7), 257 (100), 227 (76.2).

**2-Benzylidenemalononitrile (5a)**.<sup>[78]</sup> The product was obtained as white solid (73.4 mg, 95%) by flash chromatography employing a mixture of hexane and ethyl acetate (100:0, 90:10, 80:20) as eluent. **<sup>1</sup>H NMR** (400 MHz, CDCl<sub>3</sub>) δ 7.92 – 7.88 (m, 2H), 7.78 (s, 1H), 7.63 (m, 1H), 7.58 – 7.49 (m, 2H). **<sup>13</sup>C NMR** (100 MHz, CDCl<sub>3</sub>) δ 160.0, 134.6, 130.7, 129.6, 113.7, 112.6, 82.9. **MS**: *m/z* (*Rel. Int.*): 154 (M<sup>+</sup>, 100), 127 (86), 103 (58).

**2-(4-Methoxybenzylidene)malononitrile (5b)**.<sup>[78]</sup> The product was obtained as white solid (89.9 mg, 98%) by flash chromatography employing a mixture of hexane and ethyl acetate (100:0, 90:10, 80:20) as eluent. **<sup>1</sup>H NMR** (400 MHz, CDCl<sub>3</sub>) δ 7.91 (d, *J* = 9.0 Hz, 2H), 7.65 (s, 1H), 7.01 (d, *J* = 8.9 Hz, 2H), 3.91 (s, 3H). **<sup>13</sup>C NMR** (100 MHz, CDCl<sub>3</sub>) δ 164.9, 158.8, 133.4, 124.1, 115.2, 114.4, 113.3, 77.0, 55.8. **MS**: *m/z* (*Rel. Int.*): 114 (38.8), 141 (26.7), 184 (M<sup>+</sup>, 100).

**(2-Furanylbenzylidene)malononitrile (5c)**.<sup>[78-79]</sup> The product was obtained as brown solid (68.4 mg, 95%) by flash chromatography employing a mixture of hexane and ethyl acetate (100:0, 90:10, 80:20) as eluent. **<sup>1</sup>H NMR** (400 MHz, CDCl<sub>3</sub>) δ 7.81 (d, *J* = 1.7 Hz, 1H), 7.53 (s, 1H), 7.37 (d, *J* = 4.0 Hz, 1H), 6.73 (dd, *J* = 4.0, and 1.7 Hz, 1H). **<sup>13</sup>C NMR** (100 MHz, CDCl<sub>3</sub>) δ 149.6, 148.1, 143.1, 123.5, 114.4, 113.8, 112.6. **MS**: *m/z* (*Rel. Int.*): 89 (30.4), 115 (40.5), 144 (M<sup>+</sup>, 100).

## 1.5 GENERAL PROCEDURE FOR TANDEM KNOEVENAGEL-MICHAEL ADDITION-CYCLIZATION REACTION

(SCHEME 2) of Manuscript: The benzaldehyde (**1a**) (0.5 mmol, 1.0 equiv., 51  $\mu$ L), 1,3-cyclohexanedione (**2b**) (1.0 mmol, 56.1 mg, 1.0 equiv.) were added into 5 mL tube reaction, followed by the addition of WERSA (0.5 mL) and glycerol (0.5 mL). The mixture was coupled in a condenser and heated at 100  $^{\circ}$ C for 3 h. After the completion of the reaction (the progress of the reaction was monitored by TLC (10% EtOAc/hexane) and/or GC) ethyl acetate (2 mL) was added into the flask reaction and the organic layer was extracted, dried over anhydrous  $\text{MgSO}_4$  and the solvent was removed by vacuum. The brown solid obtained was then washed with EtOAc (3x 15 mL) with immediate precipitation of the white solid that was collected by filtration without further purification. The desired products **7a**, **8a** were identified by GC-MS,  $^1\text{H}$  NMR and by comparison of melting point.

**9-phenyl-3,4,5,6,7,9-hexahydro-1H-xanthene-1,8(2H)-dione (8a)**.<sup>[80]</sup> The product was obtained as white solid (121.9 mg, 83%) by filtration as described above.  $^1\text{H}$  NMR (400 MHz,  $\text{DMSO-}d_6$ )  $\delta$  7.68 – 6.47 (m, 5H), 3.92 (s, 1H), 2.65 – 2.26 (m, 4H), 2.12 (m, 4H), 1.99 – 1.48 (m, 4H). Mp ( $^{\circ}$ C): found 203–207, Ref: 203-205. **MS**:  $m/z$  (*Rel. Int.*): 294 ( $\text{M}^+$ , 50), 217 (100).

## 1.6 SELECTED SPECTRA OF REPRESENTATIVE COMPOUNDS

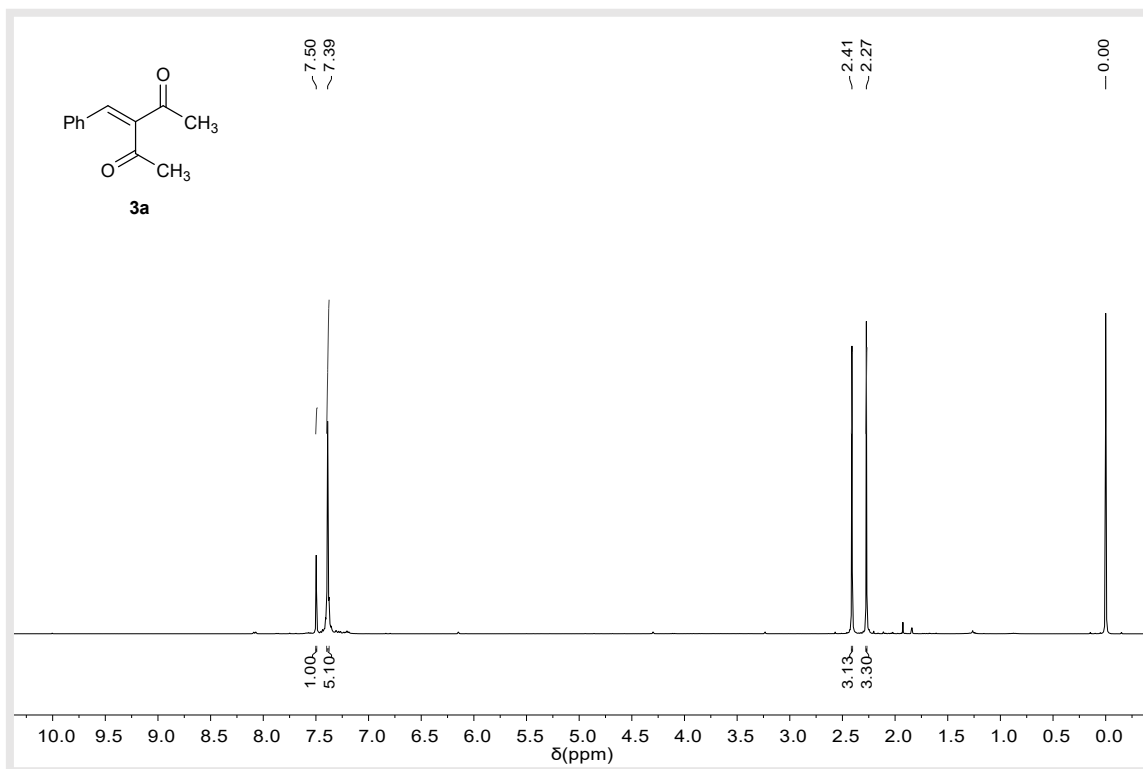

Figure S1. <sup>1</sup>H NMR (400 MHz, CDCl<sub>3</sub>) spectrum of compound **3a**.

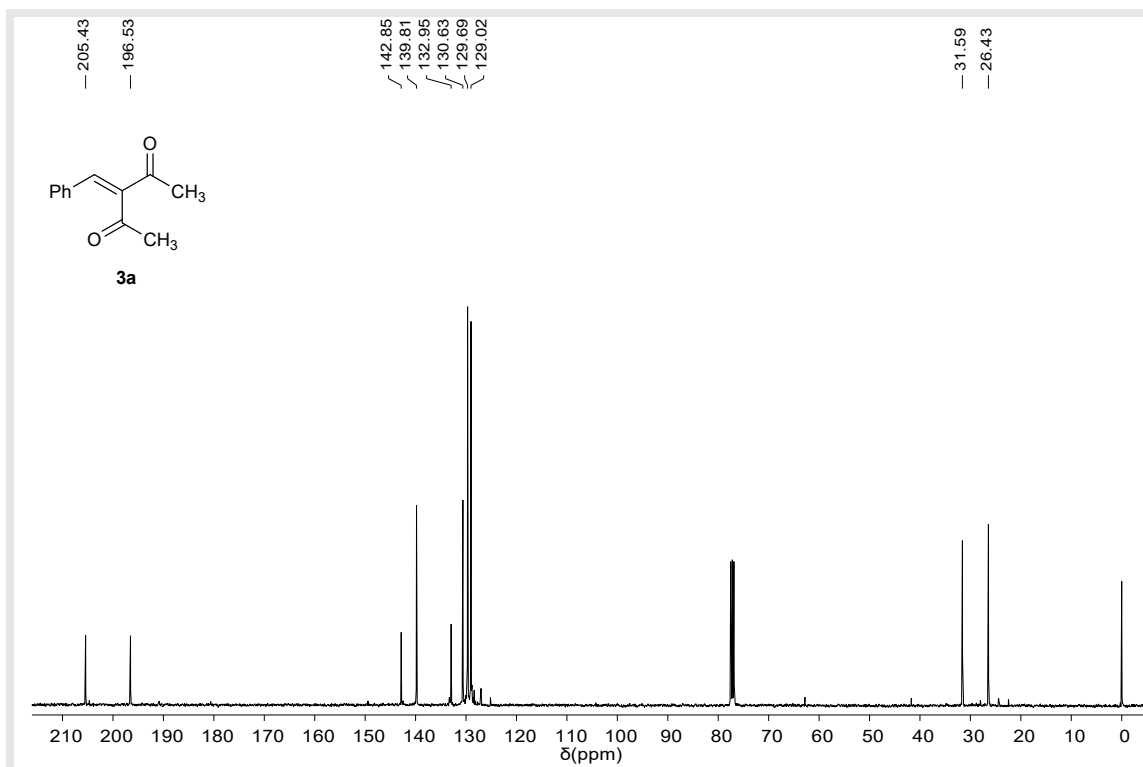

Figure S2. <sup>13</sup>C NMR (100 MHz, CDCl<sub>3</sub>) spectrum of **3a**.

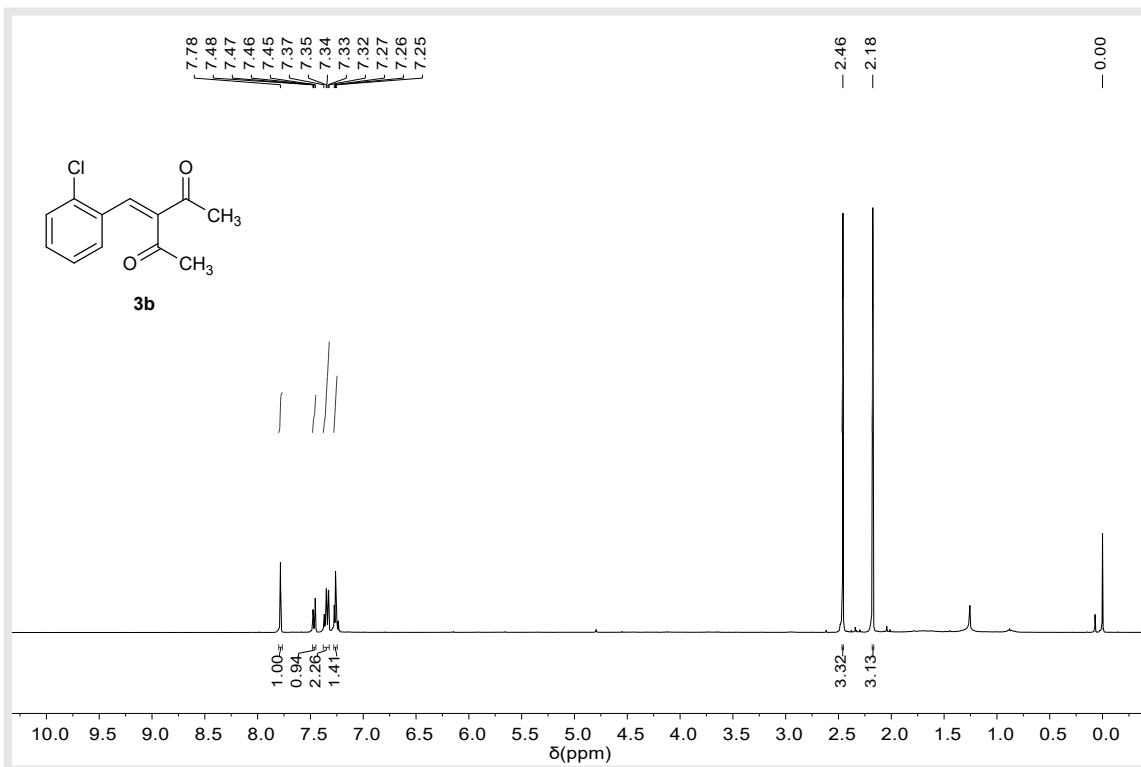

**Figure S3.** <sup>1</sup>H NMR (400 MHz, CDCl<sub>3</sub>) spectrum of compound **3b**.

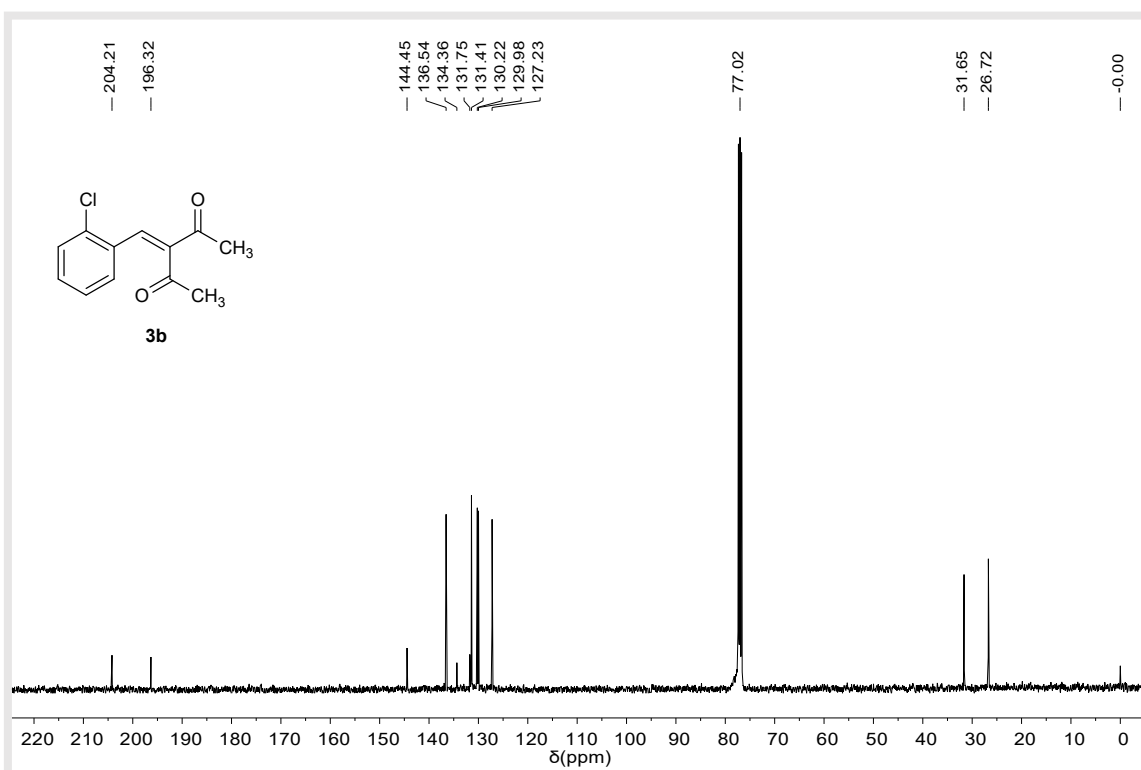

**Figure S4.** <sup>13</sup>C NMR (100 MHz, CDCl<sub>3</sub>) spectrum of **3b**.

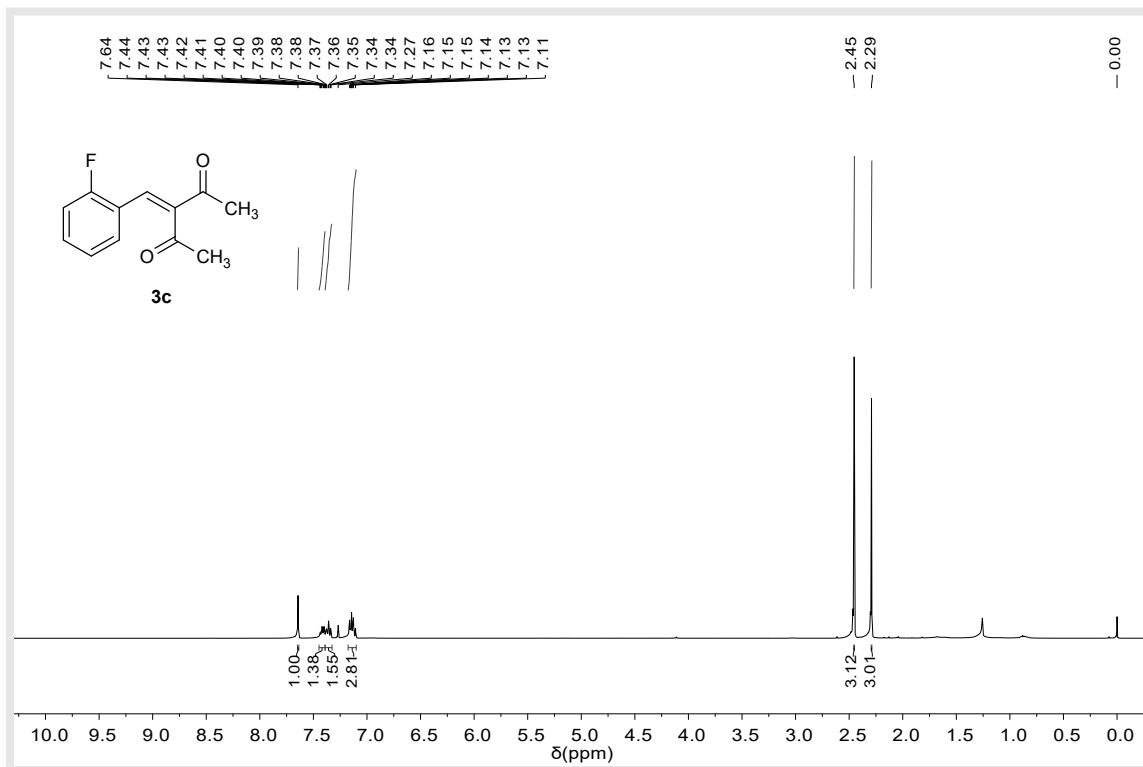

Figure S5. <sup>1</sup>H NMR (400 MHz, CDCl<sub>3</sub>) spectrum of compound **3c**.

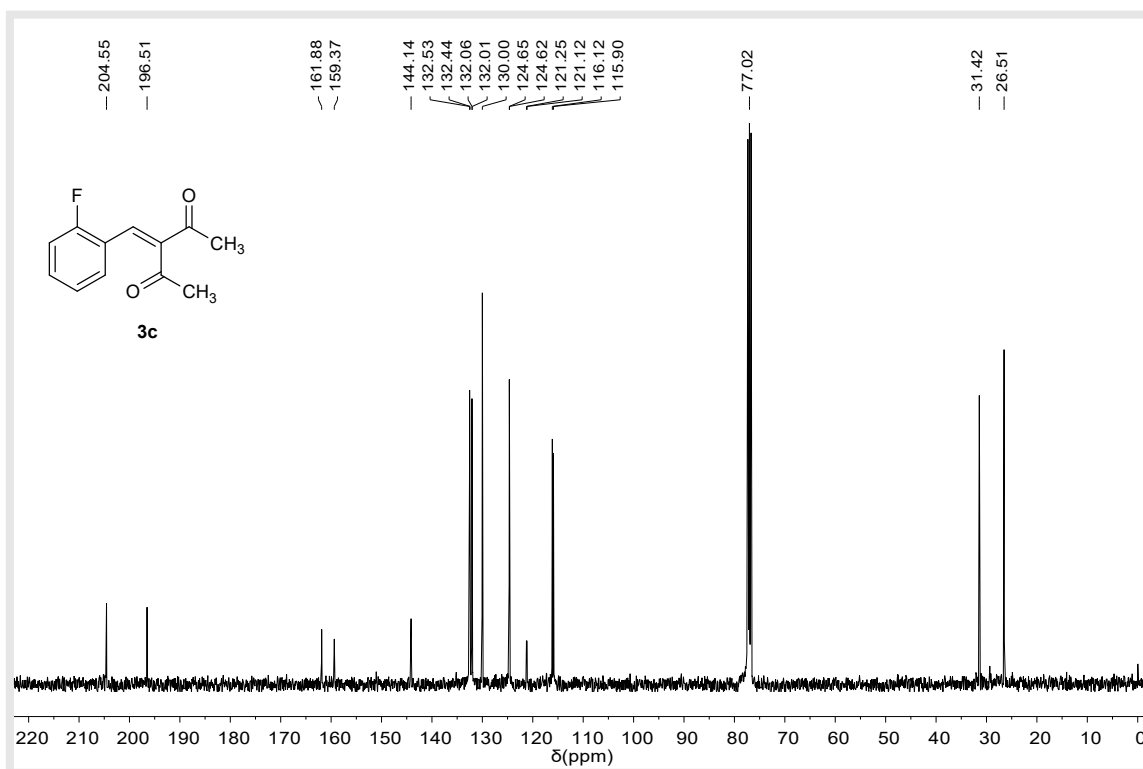

Figure S6. <sup>13</sup>C NMR (100 MHz, CDCl<sub>3</sub>) spectrum of **3c**.

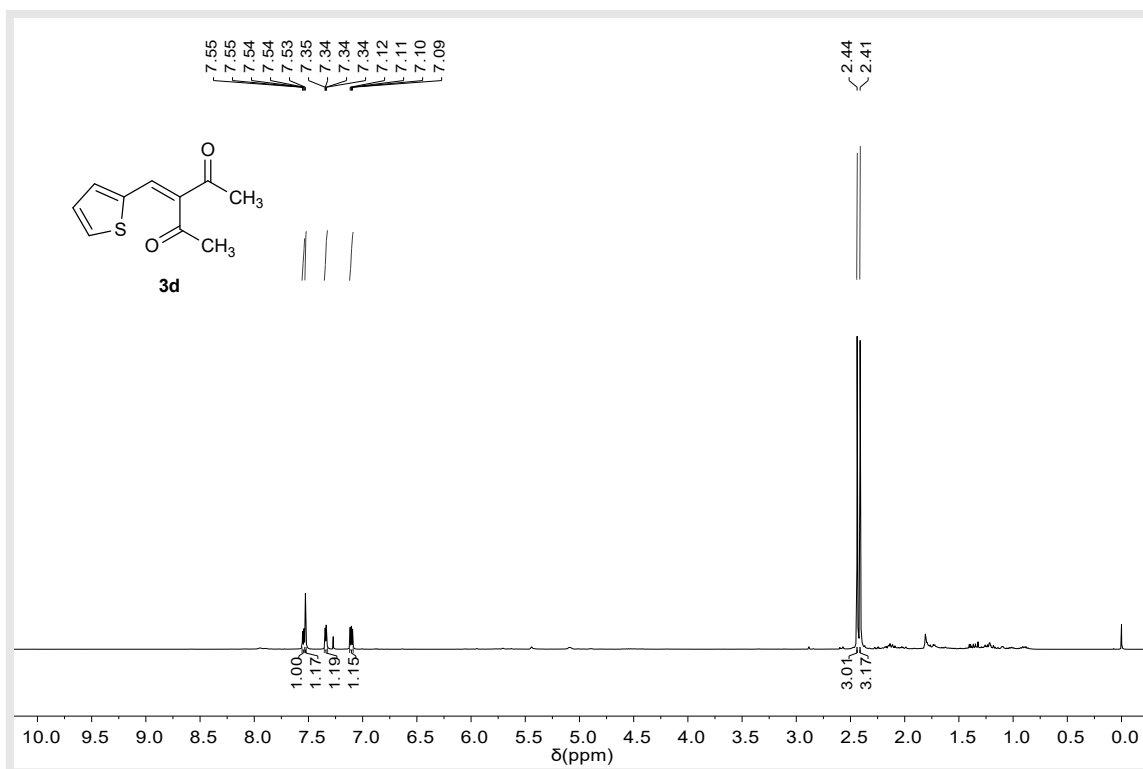

**Figure S7.** <sup>1</sup>H NMR (400 MHz, CDCl<sub>3</sub>) spectrum of compound **3d**.

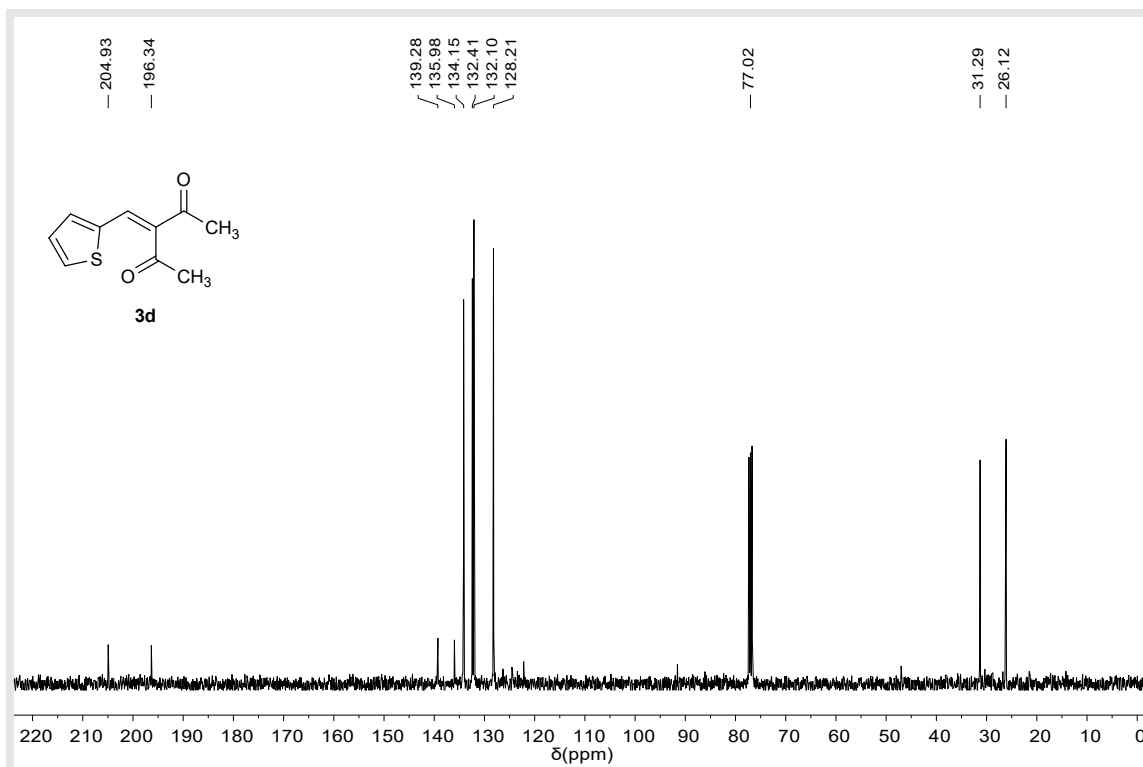

**Figure S8.** <sup>13</sup>C NMR (100 MHz, CDCl<sub>3</sub>) spectrum of **3d**.

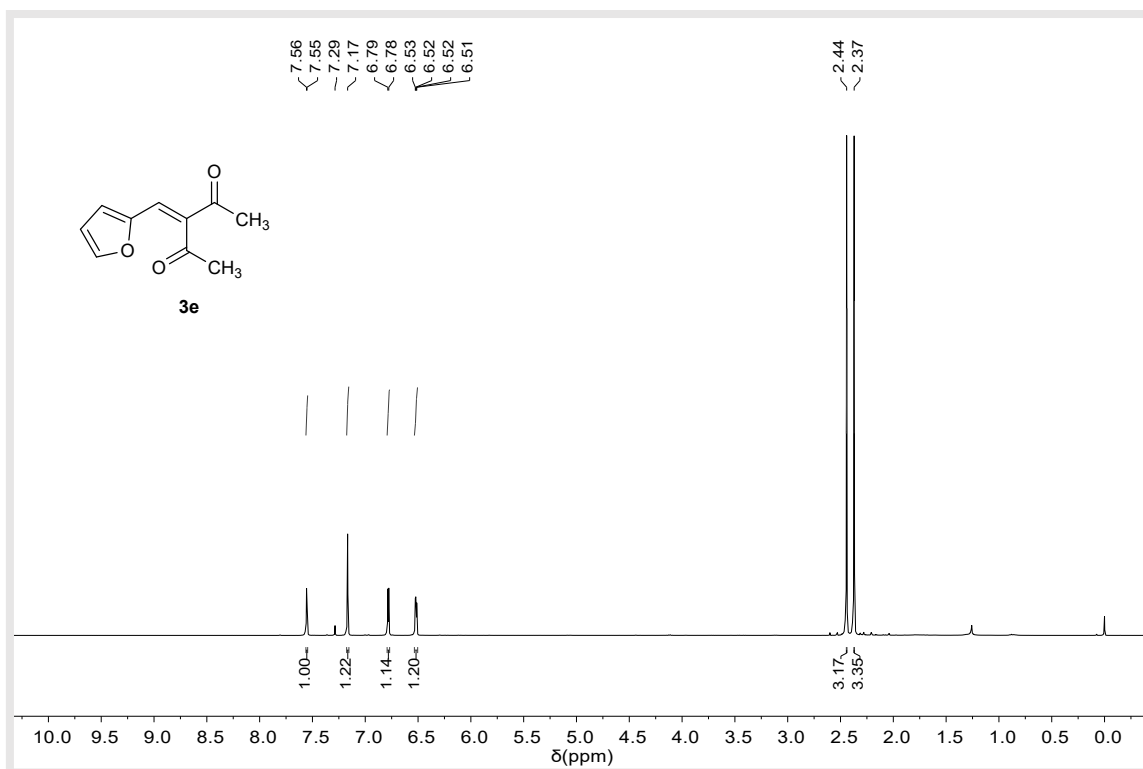

**Figure S9.** <sup>1</sup>H NMR (400 MHz, CDCl<sub>3</sub>) spectrum of compound **3e**.

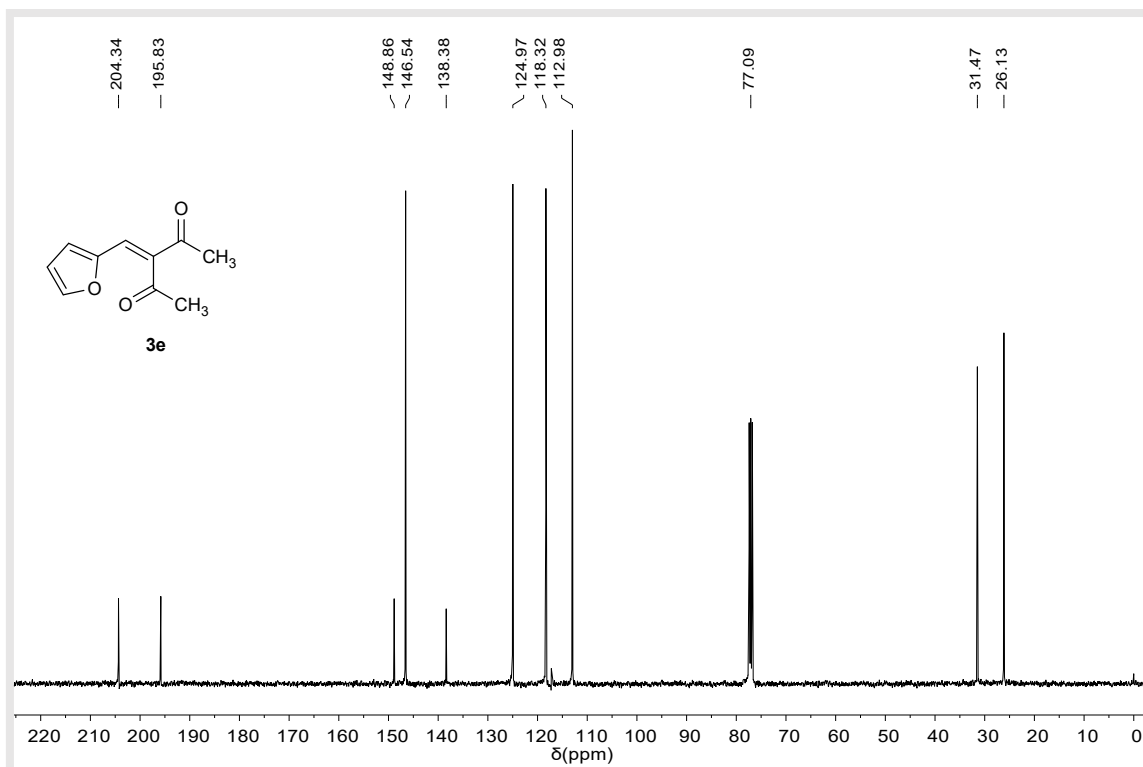

**Figure S10.** <sup>13</sup>C NMR (100 MHz, CDCl<sub>3</sub>) spectrum of **3e**.

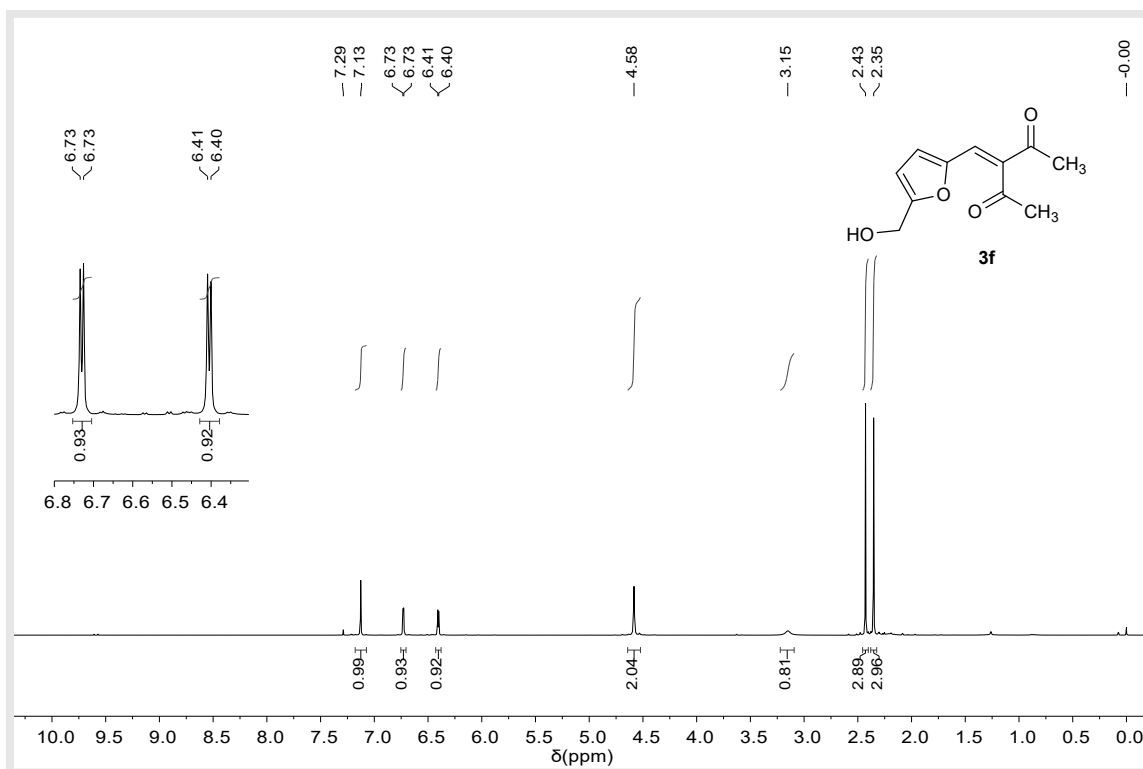

**Figure S11.** <sup>1</sup>H NMR (400 MHz, CDCl<sub>3</sub>) spectrum of compound **3f**.

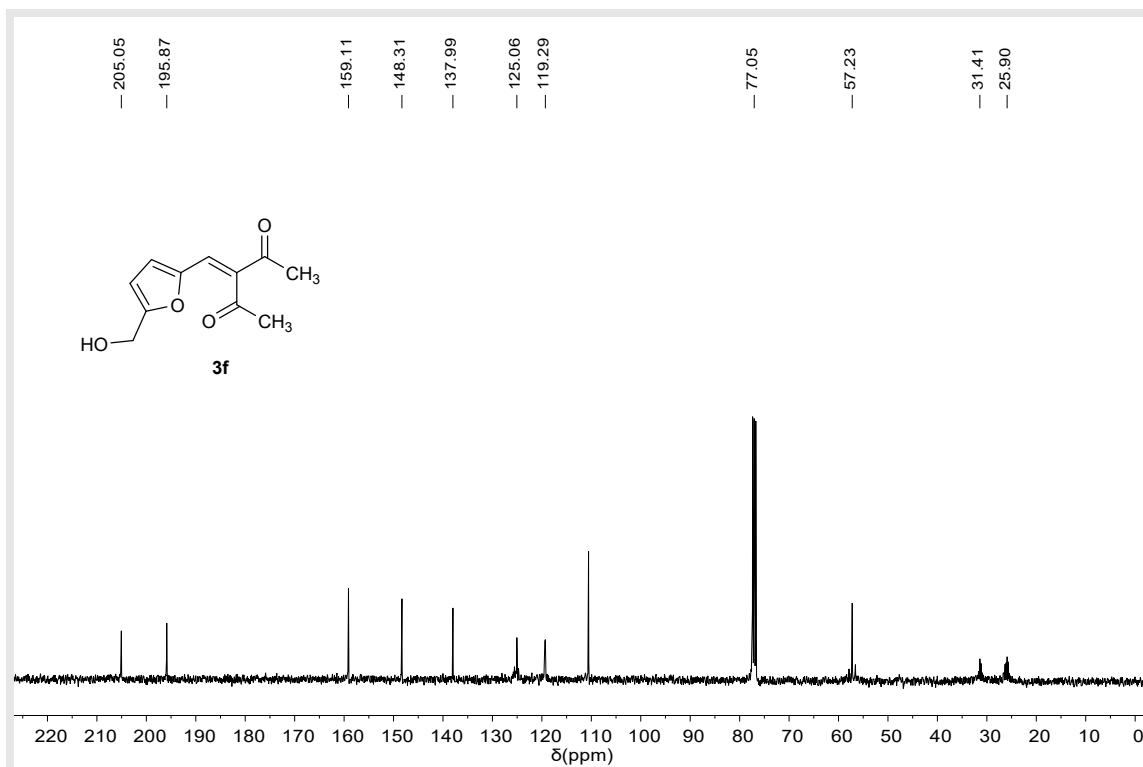

**Figure S12.** <sup>13</sup>C NMR (100 MHz, CDCl<sub>3</sub>) spectrum of **3f**.



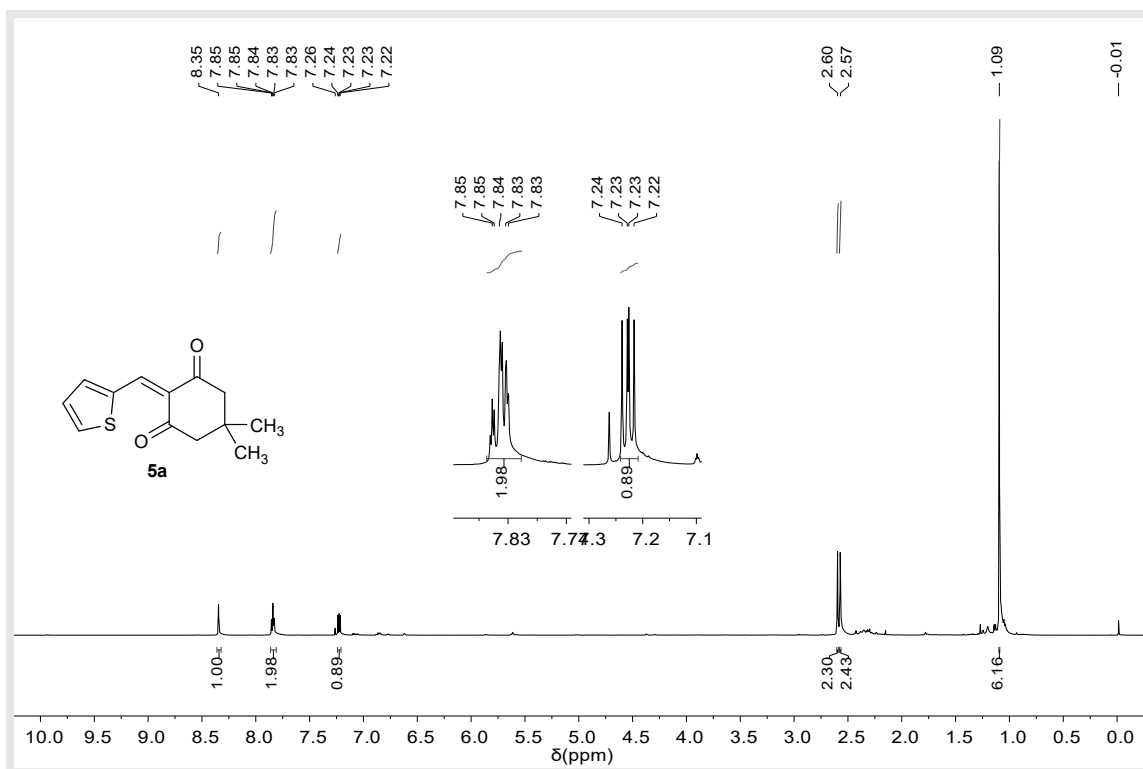

**Figure S13.** <sup>1</sup>H NMR (400 MHz, CDCl<sub>3</sub>) spectrum of **5a**.

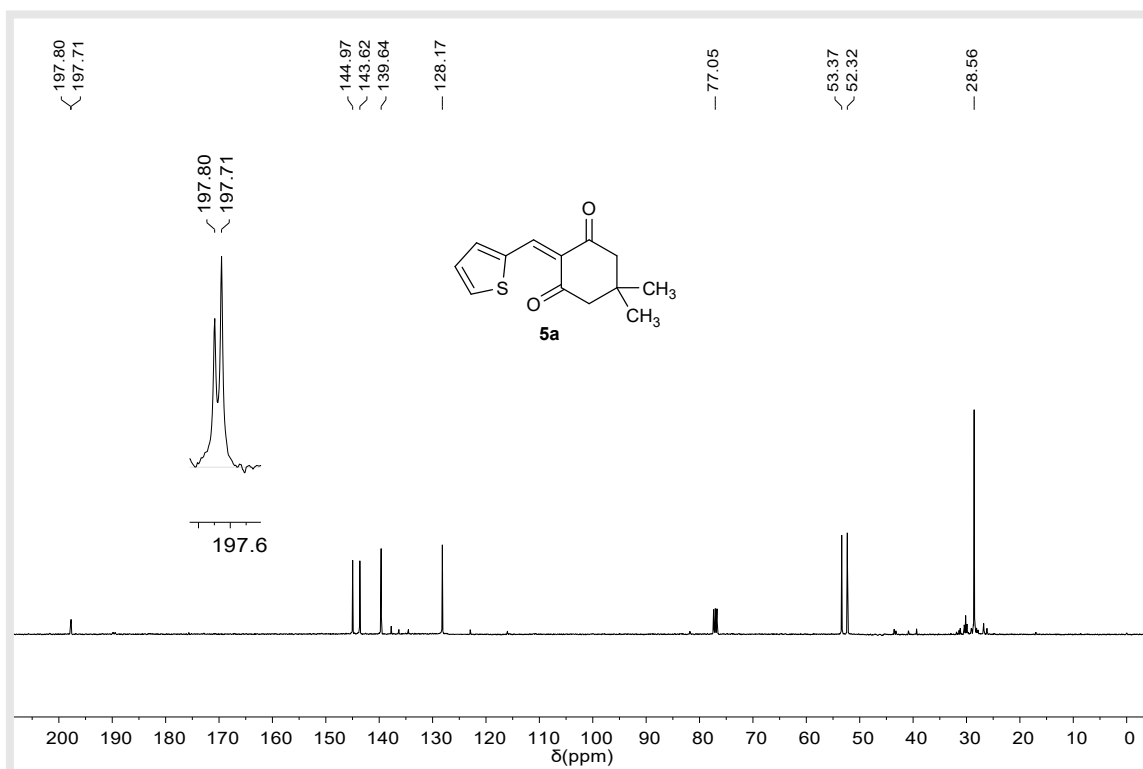

**Figure S14.** <sup>13</sup>C NMR (100 MHz, CDCl<sub>3</sub>) spectrum of **5a**.

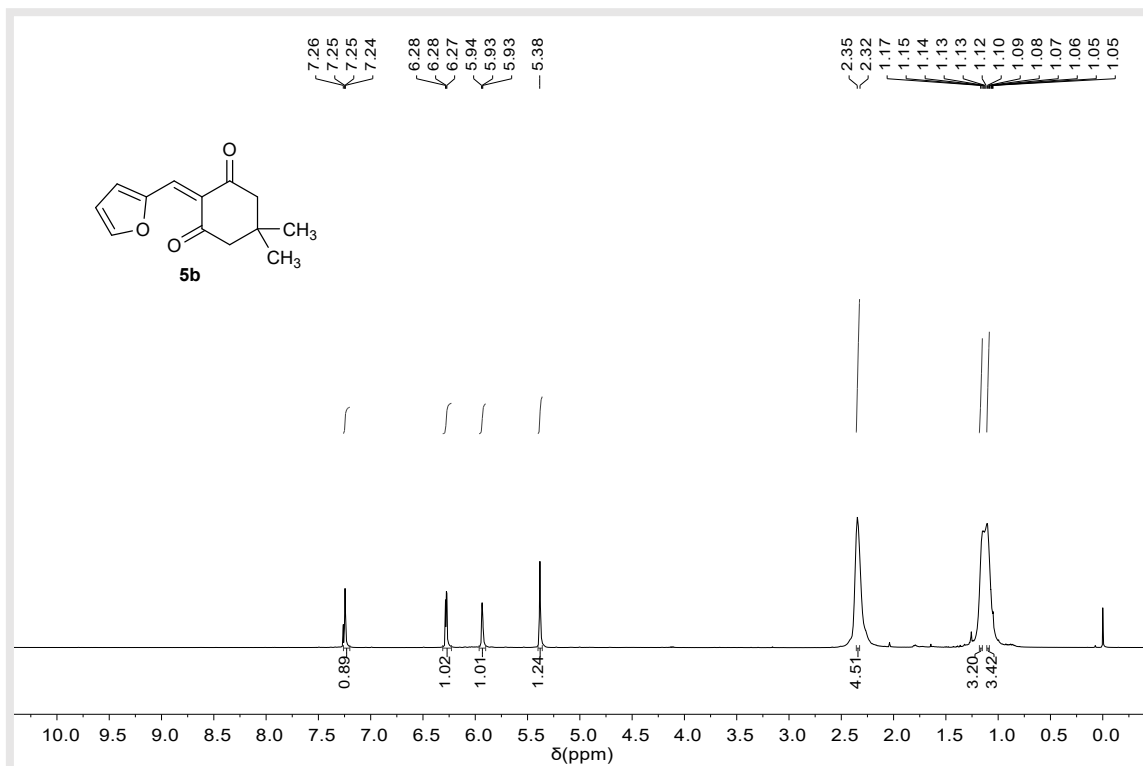

**Figure S15.** <sup>1</sup>H NMR (400 MHz, CDCl<sub>3</sub>) spectrum of compound **5b**.

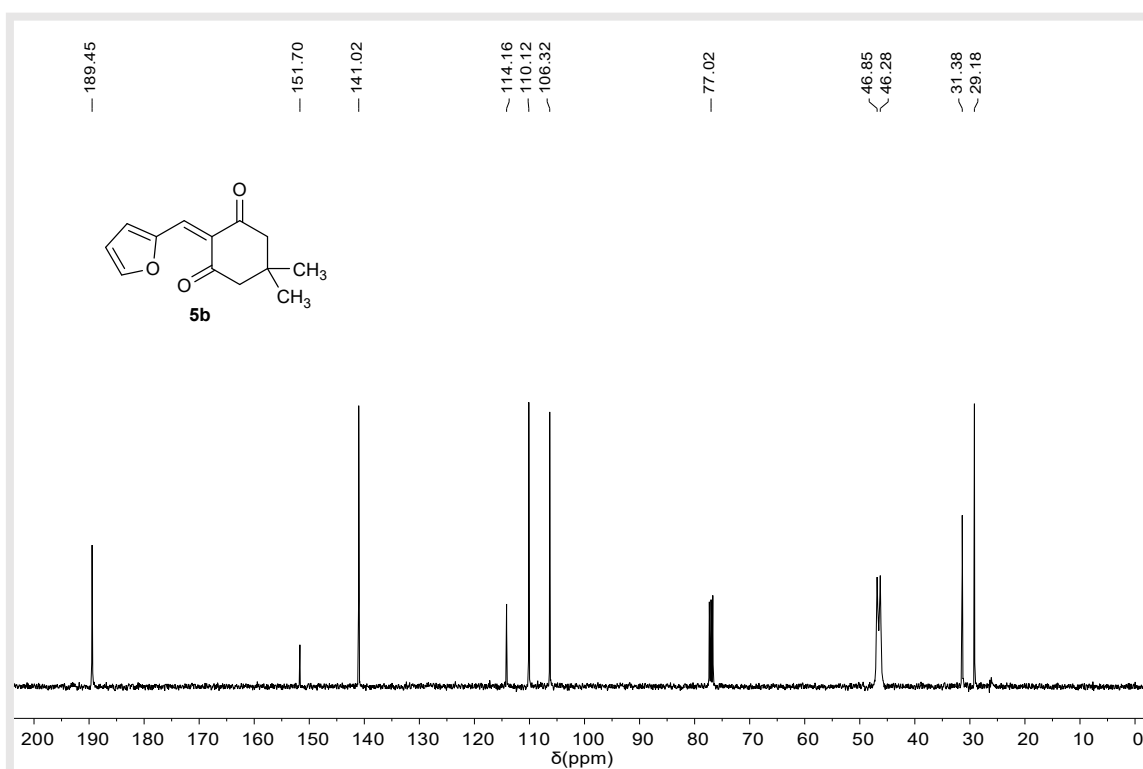

**Figure S16.** <sup>13</sup>C NMR (100 MHz, CDCl<sub>3</sub>) spectrum of **5b**.

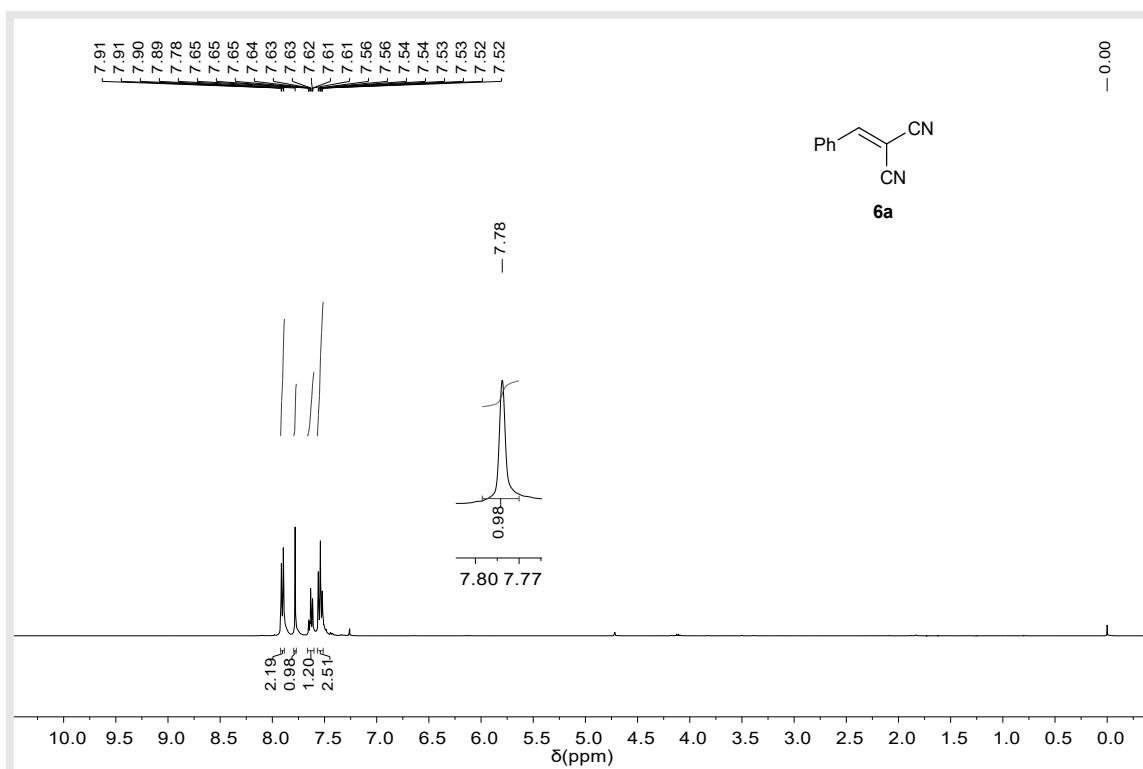

**Figure S17.** <sup>1</sup>H NMR (400 MHz, CDCl<sub>3</sub>) spectrum of compound **6a**.

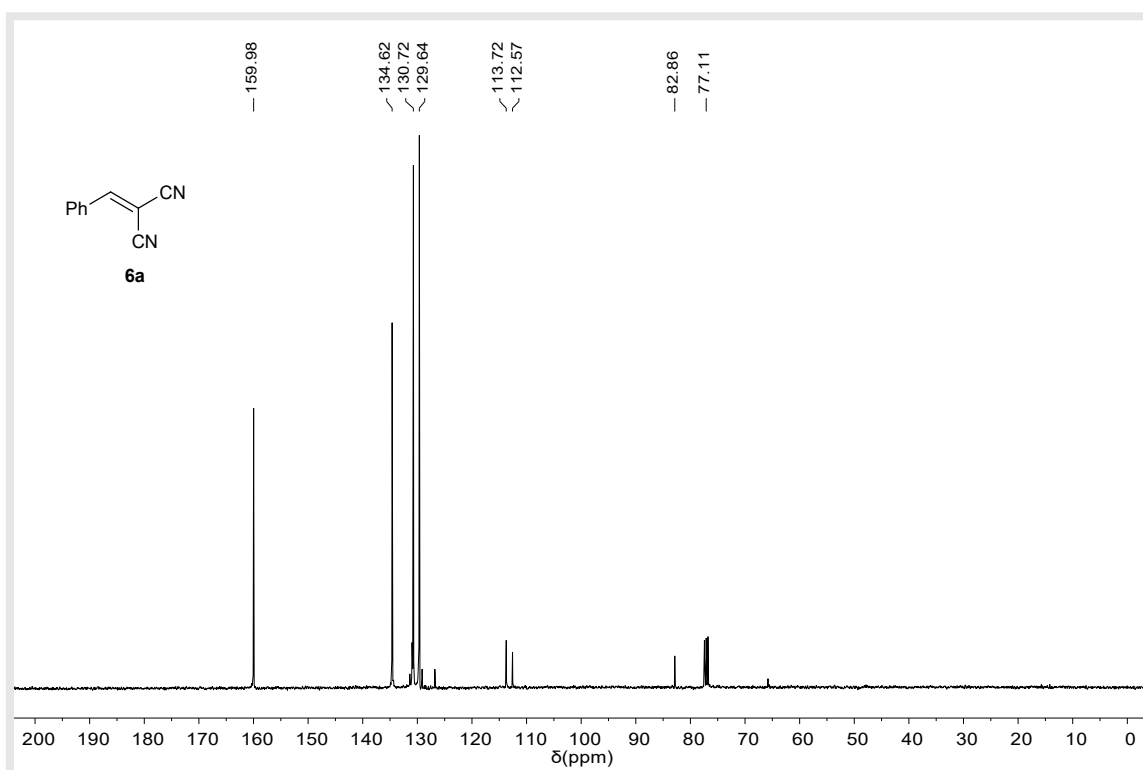

**Figure S18.** <sup>13</sup>C NMR (100 MHz, CDCl<sub>3</sub>) spectrum of **6a**.

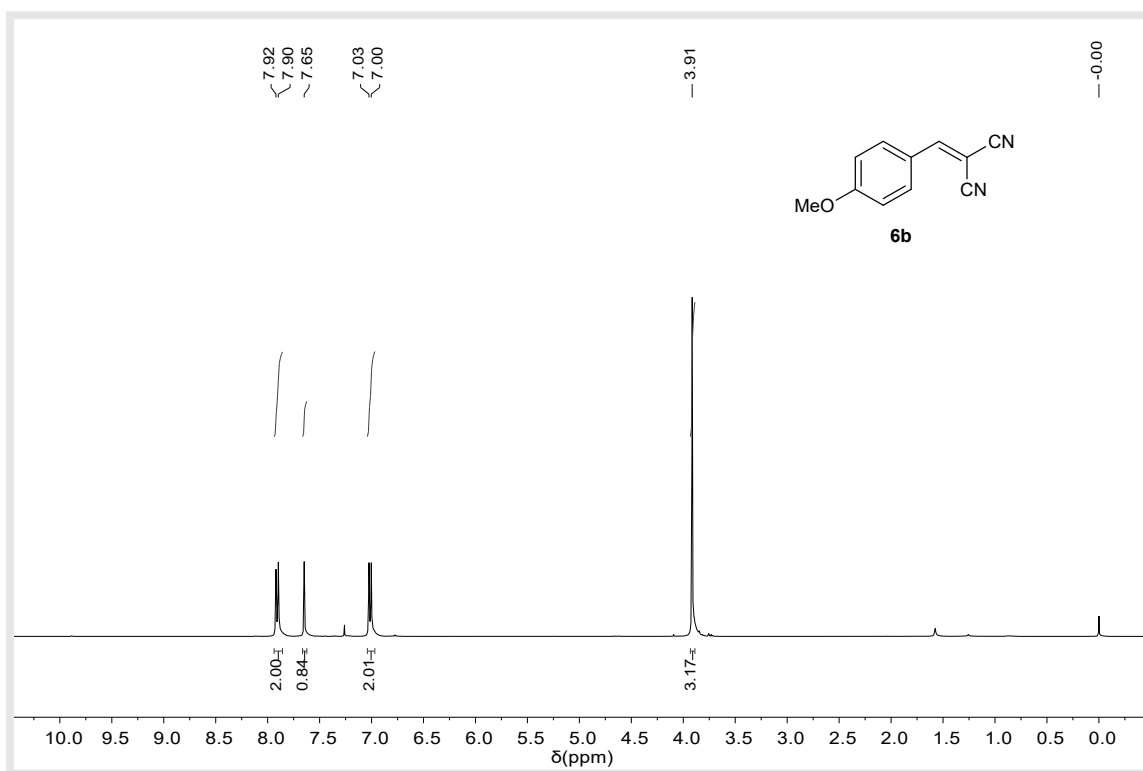

**Figure S19.** <sup>1</sup>H NMR (400 MHz, CDCl<sub>3</sub>) spectrum of compound **6b**.

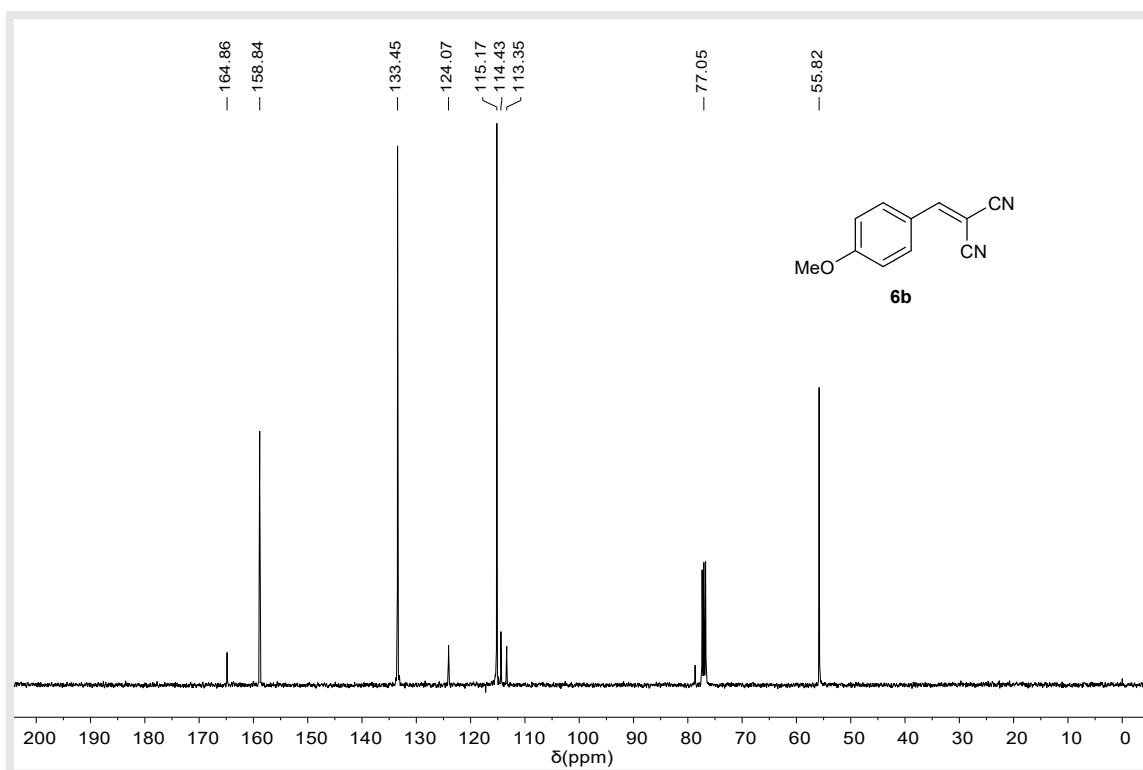

**Figure S20.** <sup>13</sup>C NMR (100 MHz, CDCl<sub>3</sub>) spectrum of **6b**.

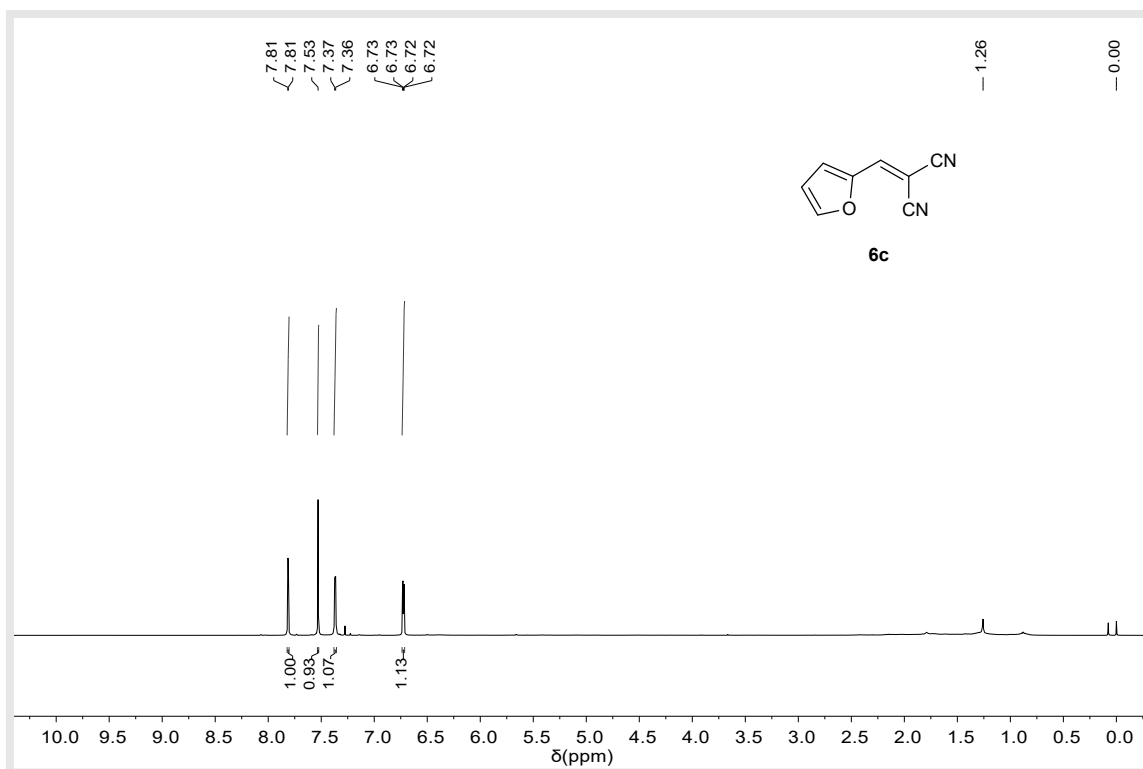

**Figure S21.** <sup>1</sup>H NMR (400 MHz, CDCl<sub>3</sub>) spectrum of **6c**.

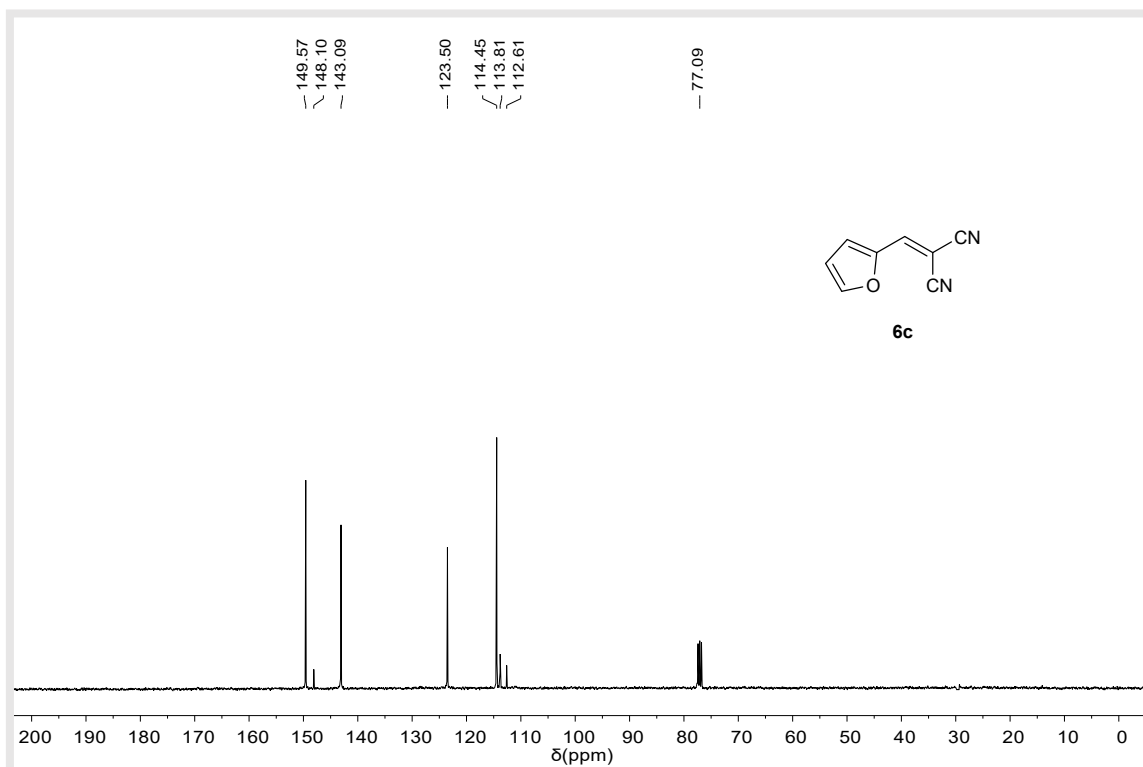

**Figure S22.** <sup>13</sup>C NMR (100 MHz, CDCl<sub>3</sub>) spectrum of **6c**.

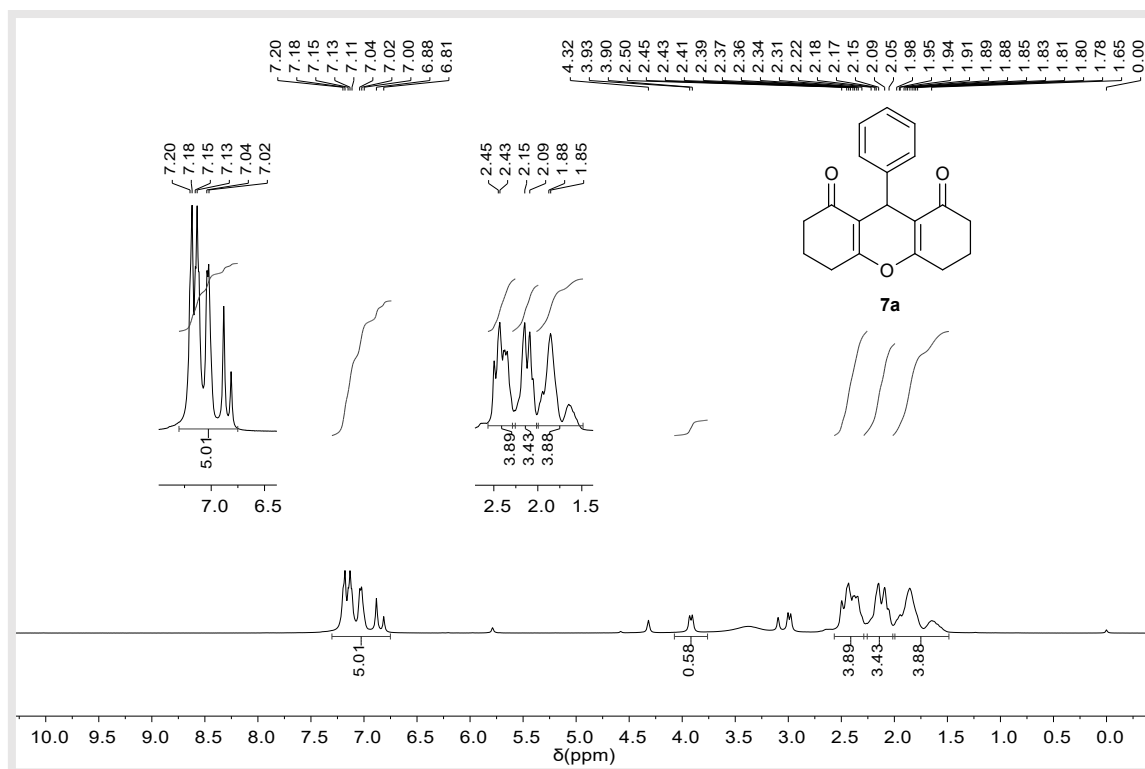

**Figure S23.** <sup>1</sup>H NMR (400 MHz, DMSO-*d*<sub>6</sub>) spectrum of **7a**.

## REFERENCES

71. K. Dettmer-Wilde, W. Engewald, *Practical gas chromatography*, Springer, **2014**.
72. D. Worgull, L. Öhler, J. P. Strache, T. Friedrichs, P. Ullrich, *Eur. J. Org. Chem.* **2017**, **2017**, 6077-6080.
73. Y. Liu, M. Ye, Q. Wu, L. Wu, J. Xu, *Lett. Drug Des. Discov.* **2014**, **11**, 993-999.
74. V. V. Martichonok, P. K. Chiang, P. J. Dornbush, K. M. Land, *Synth. Commun.* **2014**, **44**, 1245-1250.
75. N. Y. M. Abdo, R. M. Mohareb, W. N. Al-darkazali, *Anti-Cancer Agents Med. Chem.* **2020**, **20**, 335-345.
76. M. Shaibuna, K. Hiba, L. V. Theresa, K. Sreekumar, *New J. Chem.* **2020**, **44**, 14723-14732.
77. V. V. Dabholkar, F. Y. Ansari, *J. Serb. Chem. Soc.* **2009**, **74**, 1219-1228.
78. H. Cheng, L. Ning, S. Liao, W. Li, S. Tang, J. Li, H. Chen, X. Liu, L. Shao, *Appl. Catal. A-Gen.* **2021**, **623**, 118216.
79. R. Takakura, K. Koyama, M. Kuwata, T. Yamada, H. Sajiki, Y. Sawama, *Org. Biomol. Chem.* **2020**, **18**, 6594-6597.
80. P. Ghamari kargar, G. Bagherzade, H. Eshghi, *RSC Adv.* **2021**, **11**, 4339-4355.
